# Supplementary material for: A Machine-Learning Approach to Developing a Predictive Signature Based on Transcriptome Profiling of Ground-Glass Opacities for Accurate Classification and Exploring the Immune Microenvironment of Early-Stage LUAD
Source: Front Immunol. 2022 May 26;13:872387. doi: 10.3389/fimmu.2022.872387 (PMC9178173; doi:10.3389/fimmu.2022.872387)
Supplement: Supplementary file 5 [file DataSheet_4.xls]

sample	Subtype_Immune_Model_Based
TCGA-A5-A0GI-01	Wound Healing (Immune C1)
TCGA-S9-A7J2-01	Immunologically Quiet (Immune C5)
TCGA-EK-A2RE-01	IFN-gamma Dominant (Immune C2)
TCGA-D5-5538-01	IFN-gamma Dominant (Immune C2)
TCGA-F4-6854-01	Wound Healing (Immune C1)
TCGA-AX-A2H7-01	Wound Healing (Immune C1)
TCGA-C8-A1HL-01	Wound Healing (Immune C1)
TCGA-EW-A2FS-01	IFN-gamma Dominant (Immune C2)
TCGA-IR-A3L7-01	Wound Healing (Immune C1)
TCGA-05-4420-01	Wound Healing (Immune C1)
TCGA-2G-AAFZ-01	Wound Healing (Immune C1)
TCGA-DX-A3U8-01	Lymphocyte Depleted (Immune C4)
TCGA-GL-8500-01	Lymphocyte Depleted (Immune C4)
TCGA-CC-A3MA-01	Wound Healing (Immune C1)
TCGA-IN-7808-01	IFN-gamma Dominant (Immune C2)
TCGA-CC-A9FW-01	Inflammatory (Immune C3)
TCGA-AA-3982-01	IFN-gamma Dominant (Immune C2)
TCGA-B9-A8YH-01	Inflammatory (Immune C3)
TCGA-E1-A7YI-01	Lymphocyte Depleted (Immune C4)
TCGA-B5-A1MY-01	IFN-gamma Dominant (Immune C2)
TCGA-CH-5751-01	IFN-gamma Dominant (Immune C2)
TCGA-A2-A3XX-01	Wound Healing (Immune C1)
TCGA-DQ-5624-01	IFN-gamma Dominant (Immune C2)
TCGA-KK-A7B3-01	Inflammatory (Immune C3)
TCGA-HG-A2PA-01	IFN-gamma Dominant (Immune C2)
TCGA-06-5412-01	Lymphocyte Depleted (Immune C4)
TCGA-BP-4765-01	Inflammatory (Immune C3)
TCGA-EJ-8468-01	Inflammatory (Immune C3)
TCGA-CZ-5459-01	Inflammatory (Immune C3)
TCGA-KK-A8I5-01	Inflammatory (Immune C3)
TCGA-KP-A3W3-01	IFN-gamma Dominant (Immune C2)
TCGA-IQ-A61O-01	Wound Healing (Immune C1)
TCGA-BH-A18K-01	Wound Healing (Immune C1)
TCGA-DD-AAW0-01	Inflammatory (Immune C3)
TCGA-AG-A011-01	Wound Healing (Immune C1)
TCGA-AA-3511-01	IFN-gamma Dominant (Immune C2)
TCGA-Z7-A8R5-01	Wound Healing (Immune C1)
TCGA-39-5031-01	Wound Healing (Immune C1)
TCGA-ZG-A8QW-01	Inflammatory (Immune C3)
TCGA-DU-7302-01	Immunologically Quiet (Immune C5)
TCGA-DJ-A3UX-01	Inflammatory (Immune C3)
TCGA-ZN-A9VQ-01	Wound Healing (Immune C1)
TCGA-EI-6512-01	Wound Healing (Immune C1)
TCGA-J4-A83K-01	Inflammatory (Immune C3)
TCGA-2H-A9GF-01	Wound Healing (Immune C1)
TCGA-HZ-7922-01	TGF-beta Dominant (Immune C6)
TCGA-BJ-A28S-01	Inflammatory (Immune C3)
TCGA-AG-3578-01	Wound Healing (Immune C1)
TCGA-QG-A5YX-01	Wound Healing (Immune C1)
TCGA-AA-3553-01	Wound Healing (Immune C1)
TCGA-ZG-A9MC-01	IFN-gamma Dominant (Immune C2)
TCGA-FE-A238-01	IFN-gamma Dominant (Immune C2)
TCGA-DU-A7TI-01	Lymphocyte Depleted (Immune C4)
TCGA-BR-8372-01	IFN-gamma Dominant (Immune C2)
TCGA-HC-7742-01	Inflammatory (Immune C3)
TCGA-64-1679-01	Wound Healing (Immune C1)
TCGA-CV-5976-01	IFN-gamma Dominant (Immune C2)
TCGA-25-1315-01	IFN-gamma Dominant (Immune C2)
TCGA-R6-A8WC-01	Wound Healing (Immune C1)
TCGA-GE-A2C6-01	Inflammatory (Immune C3)
TCGA-CV-6948-01	Wound Healing (Immune C1)
TCGA-D1-A1NW-01	IFN-gamma Dominant (Immune C2)
TCGA-CJ-6028-01	Inflammatory (Immune C3)
TCGA-24-2297-01	IFN-gamma Dominant (Immune C2)
TCGA-CZ-5456-01	Inflammatory (Immune C3)
TCGA-AA-3693-01	Wound Healing (Immune C1)
TCGA-EM-A22Q-01	Inflammatory (Immune C3)
TCGA-49-6744-01	IFN-gamma Dominant (Immune C2)
TCGA-L5-A4ON-01	Lymphocyte Depleted (Immune C4)
TCGA-IB-7891-01	TGF-beta Dominant (Immune C6)
TCGA-ZN-A9VU-01	IFN-gamma Dominant (Immune C2)
TCGA-Q3-A5QY-01	Inflammatory (Immune C3)
TCGA-66-2794-01	IFN-gamma Dominant (Immune C2)
TCGA-AJ-A3BI-01	IFN-gamma Dominant (Immune C2)
TCGA-W2-A7UY-01	Inflammatory (Immune C3)
TCGA-E3-A3E2-01	Inflammatory (Immune C3)
TCGA-FB-A545-01	IFN-gamma Dominant (Immune C2)
TCGA-G4-6320-01	Wound Healing (Immune C1)
TCGA-EB-A41A-01	Wound Healing (Immune C1)
TCGA-55-6982-01	IFN-gamma Dominant (Immune C2)
TCGA-RC-A7SH-01	Lymphocyte Depleted (Immune C4)
TCGA-CD-8528-01	Lymphocyte Depleted (Immune C4)
TCGA-CM-6164-01	Wound Healing (Immune C1)
TCGA-C5-A1ME-01	Wound Healing (Immune C1)
TCGA-09-0369-01	Wound Healing (Immune C1)
TCGA-E2-A2P6-01	Inflammatory (Immune C3)
TCGA-VD-A8KF-01	Lymphocyte Depleted (Immune C4)
TCGA-AX-A0IZ-01	IFN-gamma Dominant (Immune C2)
TCGA-EL-A4JZ-01	Inflammatory (Immune C3)
TCGA-M7-A722-01	Lymphocyte Depleted (Immune C4)
TCGA-CV-A6K0-01	IFN-gamma Dominant (Immune C2)
TCGA-13-1512-01	IFN-gamma Dominant (Immune C2)
TCGA-BH-A1EN-01	Lymphocyte Depleted (Immune C4)
TCGA-D1-A17D-01	Inflammatory (Immune C3)
TCGA-AO-A1KT-01	Wound Healing (Immune C1)
TCGA-N9-A4Q1-01	Wound Healing (Immune C1)
TCGA-12-5299-01	Lymphocyte Depleted (Immune C4)
TCGA-EM-A3AN-01	Inflammatory (Immune C3)
TCGA-29-1761-01	IFN-gamma Dominant (Immune C2)
TCGA-BJ-A0ZJ-01	Inflammatory (Immune C3)
TCGA-P5-A5EX-01	Inflammatory (Immune C3)
TCGA-DJ-A4V2-01	Inflammatory (Immune C3)
TCGA-HT-8563-01	Lymphocyte Depleted (Immune C4)
TCGA-J8-A3O2-01	Inflammatory (Immune C3)
TCGA-E9-A3HO-01	IFN-gamma Dominant (Immune C2)
TCGA-AX-A1CA-01	IFN-gamma Dominant (Immune C2)
TCGA-A6-A567-01	Wound Healing (Immune C1)
TCGA-58-A46N-01	Wound Healing (Immune C1)
TCGA-B5-A1MR-01	IFN-gamma Dominant (Immune C2)
TCGA-A3-3383-01	IFN-gamma Dominant (Immune C2)
TCGA-NJ-A4YI-01	Inflammatory (Immune C3)
TCGA-D8-A1XJ-01	Wound Healing (Immune C1)
TCGA-VT-A80J-01	IFN-gamma Dominant (Immune C2)
TCGA-Q1-A73Q-01	IFN-gamma Dominant (Immune C2)
TCGA-AG-3587-01	IFN-gamma Dominant (Immune C2)
TCGA-BQ-5880-01	Inflammatory (Immune C3)
TCGA-75-7027-01	Wound Healing (Immune C1)
TCGA-BA-6870-01	IFN-gamma Dominant (Immune C2)
TCGA-73-4666-01	IFN-gamma Dominant (Immune C2)
TCGA-MV-A51V-01	Wound Healing (Immune C1)
TCGA-77-A5G6-01	Wound Healing (Immune C1)
TCGA-5P-A9K4-01	Inflammatory (Immune C3)
TCGA-VD-A8KE-01	Lymphocyte Depleted (Immune C4)
TCGA-56-A4BX-01	Wound Healing (Immune C1)
TCGA-E9-A3QA-01	IFN-gamma Dominant (Immune C2)
TCGA-BR-A4J9-01	Inflammatory (Immune C3)
TCGA-CV-6955-01	IFN-gamma Dominant (Immune C2)
TCGA-P3-A5Q6-01	Wound Healing (Immune C1)
TCGA-FG-A60K-01	Immunologically Quiet (Immune C5)
TCGA-D7-A4Z0-01	Inflammatory (Immune C3)
TCGA-QK-A64Z-01	IFN-gamma Dominant (Immune C2)
TCGA-2J-AABI-01	Wound Healing (Immune C1)
TCGA-AC-A2FK-01	Inflammatory (Immune C3)
TCGA-VP-A879-01	Inflammatory (Immune C3)
TCGA-29-A5NZ-01	Wound Healing (Immune C1)
TCGA-B5-A1MV-01	Wound Healing (Immune C1)
TCGA-DV-A4W0-01	Inflammatory (Immune C3)
TCGA-37-4129-01	Lymphocyte Depleted (Immune C4)
TCGA-DD-AAVZ-01	Lymphocyte Depleted (Immune C4)
TCGA-D5-6534-01	TGF-beta Dominant (Immune C6)
TCGA-DJ-A13R-01	Inflammatory (Immune C3)
TCGA-E9-A1R4-01	IFN-gamma Dominant (Immune C2)
TCGA-3U-A98F-01	Lymphocyte Depleted (Immune C4)
TCGA-77-8145-01	IFN-gamma Dominant (Immune C2)
TCGA-LL-A740-01	Wound Healing (Immune C1)
TCGA-F5-6863-01	Wound Healing (Immune C1)
TCGA-06-2565-01	Lymphocyte Depleted (Immune C4)
TCGA-33-AASD-01	Wound Healing (Immune C1)
TCGA-ET-A3BS-01	Inflammatory (Immune C3)
TCGA-DM-A1D4-01	Wound Healing (Immune C1)
TCGA-22-5478-01	Wound Healing (Immune C1)
TCGA-MN-A4N1-01	Wound Healing (Immune C1)
TCGA-LN-A4A8-01	IFN-gamma Dominant (Immune C2)
TCGA-55-7911-01	IFN-gamma Dominant (Immune C2)
TCGA-EY-A1GC-01	IFN-gamma Dominant (Immune C2)
TCGA-ED-A627-01	Inflammatory (Immune C3)
TCGA-N6-A4VC-01	Wound Healing (Immune C1)
TCGA-16-0846-01	Lymphocyte Depleted (Immune C4)
TCGA-C8-A3M8-01	Wound Healing (Immune C1)
TCGA-BH-A0BM-01	Inflammatory (Immune C3)
TCGA-DM-A0X9-01	Wound Healing (Immune C1)
TCGA-AY-A69D-01	Wound Healing (Immune C1)
TCGA-AN-A0XW-01	Wound Healing (Immune C1)
TCGA-55-A4DG-01	Inflammatory (Immune C3)
TCGA-RW-A684-01	Lymphocyte Depleted (Immune C4)
TCGA-XD-AAUL-01	Wound Healing (Immune C1)
TCGA-AA-3667-01	Wound Healing (Immune C1)
TCGA-ET-A2N4-01	Inflammatory (Immune C3)
TCGA-58-A46J-01	IFN-gamma Dominant (Immune C2)
TCGA-24-1551-01	IFN-gamma Dominant (Immune C2)
TCGA-06-2561-01	Lymphocyte Depleted (Immune C4)
TCGA-WC-A88A-01	Lymphocyte Depleted (Immune C4)
TCGA-DD-AAVV-01	Inflammatory (Immune C3)
TCGA-ZJ-A8QQ-01	IFN-gamma Dominant (Immune C2)
TCGA-37-4133-01	IFN-gamma Dominant (Immune C2)
TCGA-77-8146-01	Wound Healing (Immune C1)
TCGA-2G-AAHN-01	IFN-gamma Dominant (Immune C2)
TCGA-L9-A5IP-01	Wound Healing (Immune C1)
TCGA-CJ-5672-01	Inflammatory (Immune C3)
TCGA-73-4662-01	Inflammatory (Immune C3)
TCGA-3U-A98I-01	TGF-beta Dominant (Immune C6)
TCGA-CQ-5327-01	IFN-gamma Dominant (Immune C2)
TCGA-FI-A2F4-01	IFN-gamma Dominant (Immune C2)
TCGA-E2-A1LL-01	Wound Healing (Immune C1)
TCGA-FD-A3SR-01	IFN-gamma Dominant (Immune C2)
TCGA-KK-A8II-01	Lymphocyte Depleted (Immune C4)
TCGA-BH-A28O-01	Inflammatory (Immune C3)
TCGA-XV-AAZW-01	Wound Healing (Immune C1)
TCGA-BJ-A0Z2-01	Inflammatory (Immune C3)
TCGA-DK-A6B0-01	Lymphocyte Depleted (Immune C4)
TCGA-97-7553-01	Inflammatory (Immune C3)
TCGA-ET-A2N0-01	Inflammatory (Immune C3)
TCGA-YB-A89D-01	Wound Healing (Immune C1)
TCGA-CH-5752-01	Inflammatory (Immune C3)
TCGA-77-7142-01	IFN-gamma Dominant (Immune C2)
TCGA-CR-7374-01	IFN-gamma Dominant (Immune C2)
TCGA-KS-A4I1-01	Inflammatory (Immune C3)
TCGA-60-2719-01	IFN-gamma Dominant (Immune C2)
TCGA-VR-A8Q7-01	Wound Healing (Immune C1)
TCGA-A7-A4SC-01	Inflammatory (Immune C3)
TCGA-YU-A90Y-01	IFN-gamma Dominant (Immune C2)
TCGA-FD-A5BS-01	IFN-gamma Dominant (Immune C2)
TCGA-IG-A3Y9-01	IFN-gamma Dominant (Immune C2)
TCGA-VR-A8EY-01	Wound Healing (Immune C1)
TCGA-J7-6720-01	Inflammatory (Immune C3)
TCGA-E9-A24A-01	Lymphocyte Depleted (Immune C4)
TCGA-49-AARE-01	Wound Healing (Immune C1)
TCGA-BC-4073-01	IFN-gamma Dominant (Immune C2)
TCGA-A6-2671-01	IFN-gamma Dominant (Immune C2)
TCGA-DK-A1AD-01	IFN-gamma Dominant (Immune C2)
TCGA-B6-A400-01	IFN-gamma Dominant (Immune C2)
TCGA-EM-A2OW-01	Inflammatory (Immune C3)
TCGA-XF-AAMQ-01	IFN-gamma Dominant (Immune C2)
TCGA-BB-A5HY-01	IFN-gamma Dominant (Immune C2)
TCGA-AG-3742-01	Wound Healing (Immune C1)
TCGA-WB-A816-01	Inflammatory (Immune C3)
TCGA-EA-A410-01	Wound Healing (Immune C1)
TCGA-CN-4722-01	Wound Healing (Immune C1)
TCGA-AN-A041-01	Wound Healing (Immune C1)
TCGA-13-0899-01	Wound Healing (Immune C1)
TCGA-AY-A8YK-01	Wound Healing (Immune C1)
TCGA-QA-A7B7-01	Lymphocyte Depleted (Immune C4)
TCGA-A5-AB3J-01	Inflammatory (Immune C3)
TCGA-50-8460-01	Inflammatory (Immune C3)
TCGA-PG-A917-01	IFN-gamma Dominant (Immune C2)
TCGA-IB-7889-01	TGF-beta Dominant (Immune C6)
TCGA-EM-A3SY-01	Lymphocyte Depleted (Immune C4)
TCGA-ZG-A9L1-01	Inflammatory (Immune C3)
TCGA-CN-5361-01	IFN-gamma Dominant (Immune C2)
TCGA-EX-A3L1-01	Wound Healing (Immune C1)
TCGA-50-5933-01	TGF-beta Dominant (Immune C6)
TCGA-EM-A3O7-01	Inflammatory (Immune C3)
TCGA-IE-A4EH-01	Wound Healing (Immune C1)
TCGA-A2-A04Y-01	IFN-gamma Dominant (Immune C2)
TCGA-43-3394-01	Wound Healing (Immune C1)
TCGA-ZF-AA4T-01	IFN-gamma Dominant (Immune C2)
TCGA-MQ-A6BQ-01	Lymphocyte Depleted (Immune C4)
TCGA-E2-A1LH-01	IFN-gamma Dominant (Immune C2)
TCGA-ET-A39P-01	Inflammatory (Immune C3)
TCGA-78-7155-01	Wound Healing (Immune C1)
TCGA-2G-AAM4-01	Wound Healing (Immune C1)
TCGA-AG-3727-01	Wound Healing (Immune C1)
TCGA-E7-A3X6-01	IFN-gamma Dominant (Immune C2)
TCGA-5M-AAT4-01	Wound Healing (Immune C1)
TCGA-24-1474-01	Lymphocyte Depleted (Immune C4)
TCGA-3H-AB3U-01	Wound Healing (Immune C1)
TCGA-CM-6167-01	Wound Healing (Immune C1)
TCGA-IZ-8196-01	Inflammatory (Immune C3)
TCGA-CR-7370-01	Wound Healing (Immune C1)
TCGA-BQ-5888-01	Inflammatory (Immune C3)
TCGA-B6-A0RH-01	IFN-gamma Dominant (Immune C2)
TCGA-EL-A3ZG-01	Inflammatory (Immune C3)
TCGA-EL-A3CR-01	Inflammatory (Immune C3)
TCGA-AA-3520-01	Wound Healing (Immune C1)
TCGA-A8-A07W-01	Wound Healing (Immune C1)
TCGA-QR-A6GY-01	Lymphocyte Depleted (Immune C4)
TCGA-VD-A8KA-01	Lymphocyte Depleted (Immune C4)
TCGA-YL-A8HJ-01	Inflammatory (Immune C3)
TCGA-64-1677-01	IFN-gamma Dominant (Immune C2)
TCGA-AU-6004-01	IFN-gamma Dominant (Immune C2)
TCGA-GU-A762-01	IFN-gamma Dominant (Immune C2)
TCGA-2Z-A9JK-01	Inflammatory (Immune C3)
TCGA-CS-5397-01	Lymphocyte Depleted (Immune C4)
TCGA-AX-A3G8-01	Wound Healing (Immune C1)
TCGA-B5-A11Q-01	Inflammatory (Immune C3)
TCGA-AA-3812-01	Inflammatory (Immune C3)
TCGA-AR-A1AS-01	Lymphocyte Depleted (Immune C4)
TCGA-CZ-4860-01	Lymphocyte Depleted (Immune C4)
TCGA-DD-AACA-01	Inflammatory (Immune C3)
TCGA-09-2048-01	Wound Healing (Immune C1)
TCGA-HU-A4GQ-01	IFN-gamma Dominant (Immune C2)
TCGA-E1-5322-01	Immunologically Quiet (Immune C5)
TCGA-73-4670-01	Wound Healing (Immune C1)
TCGA-ZG-A9L5-01	Inflammatory (Immune C3)
TCGA-CN-5365-01	IFN-gamma Dominant (Immune C2)
TCGA-MT-A7BN-01	Wound Healing (Immune C1)
TCGA-BR-4371-01	IFN-gamma Dominant (Immune C2)
TCGA-B0-5700-01	Inflammatory (Immune C3)
TCGA-97-7552-01	Inflammatory (Immune C3)
TCGA-BF-A5ER-01	Lymphocyte Depleted (Immune C4)
TCGA-JW-A5VI-01	IFN-gamma Dominant (Immune C2)
TCGA-XK-AAJT-01	Lymphocyte Depleted (Immune C4)
TCGA-56-A4BW-01	IFN-gamma Dominant (Immune C2)
TCGA-56-8308-01	Wound Healing (Immune C1)
TCGA-D1-A102-01	Wound Healing (Immune C1)
TCGA-CV-6956-01	IFN-gamma Dominant (Immune C2)
TCGA-AA-3854-01	Wound Healing (Immune C1)
TCGA-AP-A056-01	Wound Healing (Immune C1)
TCGA-DQ-5631-01	Wound Healing (Immune C1)
TCGA-85-8353-01	Wound Healing (Immune C1)
TCGA-36-1580-01	Wound Healing (Immune C1)
TCGA-OL-A66O-01	IFN-gamma Dominant (Immune C2)
TCGA-HP-A5N0-01	Inflammatory (Immune C3)
TCGA-CR-7369-01	IFN-gamma Dominant (Immune C2)
TCGA-55-A48Z-01	Wound Healing (Immune C1)
TCGA-AP-A1E3-01	Wound Healing (Immune C1)
TCGA-SC-A6LP-01	Wound Healing (Immune C1)
TCGA-HT-8558-01	Immunologically Quiet (Immune C5)
TCGA-FD-A43S-01	Inflammatory (Immune C3)
TCGA-5B-A90C-01	IFN-gamma Dominant (Immune C2)
TCGA-EW-A1P0-01	Lymphocyte Depleted (Immune C4)
TCGA-A5-A0GX-01	Inflammatory (Immune C3)
TCGA-QK-A6IG-01	IFN-gamma Dominant (Immune C2)
TCGA-22-4604-01	Wound Healing (Immune C1)
TCGA-BT-A42F-01	IFN-gamma Dominant (Immune C2)
TCGA-61-1900-01	Wound Healing (Immune C1)
TCGA-Y8-A894-01	Inflammatory (Immune C3)
TCGA-S9-A6U8-01	Immunologically Quiet (Immune C5)
TCGA-DC-5337-01	Wound Healing (Immune C1)
TCGA-CV-7261-01	Wound Healing (Immune C1)
TCGA-DJ-A3V7-01	Inflammatory (Immune C3)
TCGA-KL-8345-01	Immunologically Quiet (Immune C5)
TCGA-BP-4998-01	Inflammatory (Immune C3)
TCGA-ZH-A8Y5-01	Inflammatory (Immune C3)
TCGA-EL-A3T9-01	TGF-beta Dominant (Immune C6)
TCGA-OR-A5J2-01	Inflammatory (Immune C3)
TCGA-BR-8363-01	IFN-gamma Dominant (Immune C2)
TCGA-T2-A6X2-01	IFN-gamma Dominant (Immune C2)
TCGA-CR-6492-01	IFN-gamma Dominant (Immune C2)
TCGA-G2-A3IB-01	IFN-gamma Dominant (Immune C2)
TCGA-EW-A1PC-01	IFN-gamma Dominant (Immune C2)
TCGA-BG-A0M3-01	Wound Healing (Immune C1)
TCGA-GM-A2DA-01	Wound Healing (Immune C1)
TCGA-CJ-5675-01	Inflammatory (Immune C3)
TCGA-CU-A3KJ-01	Wound Healing (Immune C1)
TCGA-A7-A0CH-01	Wound Healing (Immune C1)
TCGA-CM-6168-01	Wound Healing (Immune C1)
TCGA-E9-A2JS-01	IFN-gamma Dominant (Immune C2)
TCGA-EA-A1QT-01	IFN-gamma Dominant (Immune C2)
TCGA-L6-A4EP-01	Inflammatory (Immune C3)
TCGA-W4-A7U4-01	IFN-gamma Dominant (Immune C2)
TCGA-4E-A92E-01	IFN-gamma Dominant (Immune C2)
TCGA-HQ-A5ND-01	IFN-gamma Dominant (Immune C2)
TCGA-EL-A3ZL-01	Inflammatory (Immune C3)
TCGA-XY-A8S3-01	IFN-gamma Dominant (Immune C2)
TCGA-75-7031-01	IFN-gamma Dominant (Immune C2)
TCGA-EW-A6SB-01	IFN-gamma Dominant (Immune C2)
TCGA-A5-A1OG-01	IFN-gamma Dominant (Immune C2)
TCGA-44-A47A-01	IFN-gamma Dominant (Immune C2)
TCGA-B6-A0WV-01	Wound Healing (Immune C1)
TCGA-WB-A81J-01	Inflammatory (Immune C3)
TCGA-2G-AAL5-01	Wound Healing (Immune C1)
TCGA-HE-7129-01	Inflammatory (Immune C3)
TCGA-05-4398-01	IFN-gamma Dominant (Immune C2)
TCGA-HD-7753-01	IFN-gamma Dominant (Immune C2)
TCGA-FI-A2EU-01	IFN-gamma Dominant (Immune C2)
TCGA-BA-5559-01	IFN-gamma Dominant (Immune C2)
TCGA-KK-A59X-01	Lymphocyte Depleted (Immune C4)
TCGA-LN-A4MQ-01	Wound Healing (Immune C1)
TCGA-UL-AAZ6-01	IFN-gamma Dominant (Immune C2)
TCGA-B6-A0RG-01	IFN-gamma Dominant (Immune C2)
TCGA-SP-A6QC-01	Lymphocyte Depleted (Immune C4)
TCGA-SJ-A6ZI-01	IFN-gamma Dominant (Immune C2)
TCGA-67-3773-01	Inflammatory (Immune C3)
TCGA-24-1562-01	Wound Healing (Immune C1)
TCGA-VS-AA62-01	IFN-gamma Dominant (Immune C2)
TCGA-EM-A3SU-01	Inflammatory (Immune C3)
TCGA-HT-7874-01	Immunologically Quiet (Immune C5)
TCGA-77-8007-01	Wound Healing (Immune C1)
TCGA-D1-A179-01	Wound Healing (Immune C1)
TCGA-FK-A3SG-01	Inflammatory (Immune C3)
TCGA-77-7463-01	Wound Healing (Immune C1)
TCGA-S9-A6TV-01	Lymphocyte Depleted (Immune C4)
TCGA-BH-A6R9-01	Wound Healing (Immune C1)
TCGA-39-5039-01	Wound Healing (Immune C1)
TCGA-UC-A7PG-01	Wound Healing (Immune C1)
TCGA-DK-A3IS-01	Wound Healing (Immune C1)
TCGA-BR-4363-01	IFN-gamma Dominant (Immune C2)
TCGA-CV-6943-01	IFN-gamma Dominant (Immune C2)
TCGA-64-5781-01	Wound Healing (Immune C1)
TCGA-L5-A4OX-01	IFN-gamma Dominant (Immune C2)
TCGA-UY-A8OD-01	Wound Healing (Immune C1)
TCGA-EO-A2CH-01	IFN-gamma Dominant (Immune C2)
TCGA-CQ-7068-01	IFN-gamma Dominant (Immune C2)
TCGA-VM-A8CD-01	Lymphocyte Depleted (Immune C4)
TCGA-D8-A1JN-01	Inflammatory (Immune C3)
TCGA-CV-5444-01	IFN-gamma Dominant (Immune C2)
TCGA-AR-A24P-01	Wound Healing (Immune C1)
TCGA-EA-A97N-01	IFN-gamma Dominant (Immune C2)
TCGA-LN-A49K-01	IFN-gamma Dominant (Immune C2)
TCGA-SX-A7SM-01	Lymphocyte Depleted (Immune C4)
TCGA-DJ-A4V5-01	Inflammatory (Immune C3)
TCGA-DD-AAEI-01	Lymphocyte Depleted (Immune C4)
TCGA-AZ-4615-01	IFN-gamma Dominant (Immune C2)
TCGA-06-0132-01	Lymphocyte Depleted (Immune C4)
TCGA-VR-A8EO-01	Wound Healing (Immune C1)
TCGA-HT-7616-01	Lymphocyte Depleted (Immune C4)
TCGA-CR-7395-01	IFN-gamma Dominant (Immune C2)
TCGA-DJ-A2PS-01	Inflammatory (Immune C3)
TCGA-BR-7196-01	IFN-gamma Dominant (Immune C2)
TCGA-AA-A02H-01	Wound Healing (Immune C1)
TCGA-AP-A0LL-01	Inflammatory (Immune C3)
TCGA-BP-4777-01	Inflammatory (Immune C3)
TCGA-24-2290-01	Lymphocyte Depleted (Immune C4)
TCGA-ET-A39J-01	Lymphocyte Depleted (Immune C4)
TCGA-E9-A1N9-01	Wound Healing (Immune C1)
TCGA-B6-A0I9-01	Wound Healing (Immune C1)
TCGA-CN-6022-01	Wound Healing (Immune C1)
TCGA-E8-A242-01	Inflammatory (Immune C3)
TCGA-DJ-A2Q5-01	Inflammatory (Immune C3)
TCGA-DW-7963-01	Inflammatory (Immune C3)
TCGA-E2-A1L9-01	IFN-gamma Dominant (Immune C2)
TCGA-NC-A5HE-01	IFN-gamma Dominant (Immune C2)
TCGA-BP-4797-01	Inflammatory (Immune C3)
TCGA-E5-A4U1-01	Wound Healing (Immune C1)
TCGA-OE-A75W-01	Wound Healing (Immune C1)
TCGA-DX-AB3C-01	Wound Healing (Immune C1)
TCGA-BP-4762-01	Inflammatory (Immune C3)
TCGA-AR-A1AP-01	IFN-gamma Dominant (Immune C2)
TCGA-KT-A7W1-01	Lymphocyte Depleted (Immune C4)
TCGA-44-3919-01	IFN-gamma Dominant (Immune C2)
TCGA-39-5035-01	IFN-gamma Dominant (Immune C2)
TCGA-CV-6952-01	IFN-gamma Dominant (Immune C2)
TCGA-BR-4367-01	IFN-gamma Dominant (Immune C2)
TCGA-CN-A63T-01	IFN-gamma Dominant (Immune C2)
TCGA-BH-A0H5-01	TGF-beta Dominant (Immune C6)
TCGA-OK-A5Q2-01	Inflammatory (Immune C3)
TCGA-B5-A0K9-01	Wound Healing (Immune C1)
TCGA-CV-A45P-01	IFN-gamma Dominant (Immune C2)
TCGA-BH-A0E6-01	Wound Healing (Immune C1)
TCGA-D8-A1JA-01	Lymphocyte Depleted (Immune C4)
TCGA-56-7221-01	IFN-gamma Dominant (Immune C2)
TCGA-4G-AAZT-01	Inflammatory (Immune C3)
TCGA-VR-A8EX-01	IFN-gamma Dominant (Immune C2)
TCGA-B0-4844-01	IFN-gamma Dominant (Immune C2)
TCGA-P5-A5F2-01	Immunologically Quiet (Immune C5)
TCGA-BP-4352-01	Wound Healing (Immune C1)
TCGA-99-8032-01	Wound Healing (Immune C1)
TCGA-BH-A0BW-01	IFN-gamma Dominant (Immune C2)
TCGA-DW-7841-01	Inflammatory (Immune C3)
TCGA-H7-8502-01	IFN-gamma Dominant (Immune C2)
TCGA-CV-A6JN-01	IFN-gamma Dominant (Immune C2)
TCGA-OR-A5LN-01	Inflammatory (Immune C3)
TCGA-BH-A0HB-01	IFN-gamma Dominant (Immune C2)
TCGA-AG-3609-01	IFN-gamma Dominant (Immune C2)
TCGA-29-1695-01	Lymphocyte Depleted (Immune C4)
TCGA-H2-A2K9-01	Inflammatory (Immune C3)
TCGA-G9-7509-01	Inflammatory (Immune C3)
TCGA-FV-A2QR-01	Inflammatory (Immune C3)
TCGA-19-2629-01	Lymphocyte Depleted (Immune C4)
TCGA-B2-4098-01	Inflammatory (Immune C3)
TCGA-D7-8575-01	Inflammatory (Immune C3)
TCGA-HT-7607-01	Immunologically Quiet (Immune C5)
TCGA-CR-7380-01	IFN-gamma Dominant (Immune C2)
TCGA-43-2576-01	Wound Healing (Immune C1)
TCGA-DJ-A2PW-01	IFN-gamma Dominant (Immune C2)
TCGA-N8-A56S-01	Wound Healing (Immune C1)
TCGA-BR-8367-01	Wound Healing (Immune C1)
TCGA-ET-A3BW-01	Inflammatory (Immune C3)
TCGA-06-0238-01	Lymphocyte Depleted (Immune C4)
TCGA-FB-AAQ3-01	IFN-gamma Dominant (Immune C2)
TCGA-CJ-5679-01	Inflammatory (Immune C3)
TCGA-C5-A8YR-01	IFN-gamma Dominant (Immune C2)
TCGA-AQ-A54O-01	Wound Healing (Immune C1)
TCGA-V1-A9Z7-01	Wound Healing (Immune C1)
TCGA-KL-8346-01	Inflammatory (Immune C3)
TCGA-FE-A239-01	Inflammatory (Immune C3)
TCGA-DQ-7594-01	IFN-gamma Dominant (Immune C2)
TCGA-XF-A8HF-01	Wound Healing (Immune C1)
TCGA-KQ-A41P-01	Wound Healing (Immune C1)
TCGA-DX-A8BH-01	IFN-gamma Dominant (Immune C2)
TCGA-DD-AACT-01	Inflammatory (Immune C3)
TCGA-BL-A13I-01	Lymphocyte Depleted (Immune C4)
TCGA-DX-A7EU-01	Inflammatory (Immune C3)
TCGA-B6-A0WZ-01	IFN-gamma Dominant (Immune C2)
TCGA-C8-A135-01	Wound Healing (Immune C1)
TCGA-39-5027-01	Wound Healing (Immune C1)
TCGA-HD-7917-01	IFN-gamma Dominant (Immune C2)
TCGA-A5-A0VQ-01	Wound Healing (Immune C1)
TCGA-22-5485-01	Lymphocyte Depleted (Immune C4)
TCGA-EL-A4K1-01	Inflammatory (Immune C3)
TCGA-H4-A2HQ-01	IFN-gamma Dominant (Immune C2)
TCGA-AK-3427-01	Lymphocyte Depleted (Immune C4)
TCGA-DJ-A2PX-01	Inflammatory (Immune C3)
TCGA-BH-A0BJ-01	Inflammatory (Immune C3)
TCGA-BH-A203-01	Wound Healing (Immune C1)
TCGA-BG-A0M0-01	Wound Healing (Immune C1)
TCGA-24-1419-01	IFN-gamma Dominant (Immune C2)
TCGA-AG-3583-01	Wound Healing (Immune C1)
TCGA-V4-A9F7-01	Lymphocyte Depleted (Immune C4)
TCGA-GL-A9DD-01	Inflammatory (Immune C3)
TCGA-13-A5FT-01	IFN-gamma Dominant (Immune C2)
TCGA-WB-A81M-01	Lymphocyte Depleted (Immune C4)
TCGA-HT-7873-01	Immunologically Quiet (Immune C5)
TCGA-55-A491-01	IFN-gamma Dominant (Immune C2)
TCGA-FY-A3NM-01	Inflammatory (Immune C3)
TCGA-06-0749-01	Lymphocyte Depleted (Immune C4)
TCGA-ND-A4WF-01	Wound Healing (Immune C1)
TCGA-AZ-4681-01	Wound Healing (Immune C1)
TCGA-46-6025-01	IFN-gamma Dominant (Immune C2)
TCGA-FE-A236-01	Lymphocyte Depleted (Immune C4)
TCGA-ZF-AA4W-01	IFN-gamma Dominant (Immune C2)
TCGA-UY-A9PA-01	IFN-gamma Dominant (Immune C2)
TCGA-AA-3968-01	Wound Healing (Immune C1)
TCGA-BG-A0MO-01	IFN-gamma Dominant (Immune C2)
TCGA-HT-7603-01	Immunologically Quiet (Immune C5)
TCGA-AJ-A2QN-01	Wound Healing (Immune C1)
TCGA-AJ-A3NF-01	IFN-gamma Dominant (Immune C2)
TCGA-FU-A40J-01	IFN-gamma Dominant (Immune C2)
TCGA-B9-4116-01	Inflammatory (Immune C3)
TCGA-BH-A0C7-01	IFN-gamma Dominant (Immune C2)
TCGA-50-6595-01	IFN-gamma Dominant (Immune C2)
TCGA-DB-A64P-01	Immunologically Quiet (Immune C5)
TCGA-BP-4981-01	Inflammatory (Immune C3)
TCGA-VS-A9V5-01	Wound Healing (Immune C1)
TCGA-AK-3428-01	Inflammatory (Immune C3)
TCGA-CR-7373-01	IFN-gamma Dominant (Immune C2)
TCGA-G4-6311-01	Wound Healing (Immune C1)
TCGA-BH-A8FZ-01	IFN-gamma Dominant (Immune C2)
TCGA-S3-AA17-01	IFN-gamma Dominant (Immune C2)
TCGA-DF-A2L0-01	IFN-gamma Dominant (Immune C2)
TCGA-CI-6619-01	Wound Healing (Immune C1)
TCGA-B7-A5TI-01	Wound Healing (Immune C1)
TCGA-D8-A13Z-01	IFN-gamma Dominant (Immune C2)
TCGA-BA-5152-01	IFN-gamma Dominant (Immune C2)
TCGA-DD-AAEE-01	Lymphocyte Depleted (Immune C4)
TCGA-A4-7997-01	Lymphocyte Depleted (Immune C4)
TCGA-DX-A48O-01	Inflammatory (Immune C3)
TCGA-A7-A6VX-01	IFN-gamma Dominant (Immune C2)
TCGA-VS-A8Q9-01	IFN-gamma Dominant (Immune C2)
TCGA-60-2713-01	Wound Healing (Immune C1)
TCGA-GU-A42Q-01	Wound Healing (Immune C1)
TCGA-95-A4VP-01	Inflammatory (Immune C3)
TCGA-BP-4340-01	Inflammatory (Immune C3)
TCGA-HC-8261-01	Inflammatory (Immune C3)
TCGA-85-A512-01	Wound Healing (Immune C1)
TCGA-ET-A25P-01	Inflammatory (Immune C3)
TCGA-DJ-A3VI-01	Inflammatory (Immune C3)
TCGA-55-8302-01	IFN-gamma Dominant (Immune C2)
TCGA-44-4112-01	Wound Healing (Immune C1)
TCGA-EJ-A65E-01	Inflammatory (Immune C3)
TCGA-AF-3911-01	Wound Healing (Immune C1)
TCGA-UF-A7JJ-01	IFN-gamma Dominant (Immune C2)
TCGA-05-4430-01	IFN-gamma Dominant (Immune C2)
TCGA-AR-A255-01	IFN-gamma Dominant (Immune C2)
TCGA-WB-A81F-01	Inflammatory (Immune C3)
TCGA-V4-A9EQ-01	Lymphocyte Depleted (Immune C4)
TCGA-HZ-7919-01	Wound Healing (Immune C1)
TCGA-CN-5366-01	IFN-gamma Dominant (Immune C2)
TCGA-AR-A1AT-01	IFN-gamma Dominant (Immune C2)
TCGA-E5-A2PC-01	IFN-gamma Dominant (Immune C2)
TCGA-AD-6899-01	Wound Healing (Immune C1)
TCGA-YL-A8HM-01	IFN-gamma Dominant (Immune C2)
TCGA-CD-A486-01	IFN-gamma Dominant (Immune C2)
TCGA-UY-A9PE-01	Wound Healing (Immune C1)
TCGA-CQ-7071-01	IFN-gamma Dominant (Immune C2)
TCGA-D1-A3DG-01	Wound Healing (Immune C1)
TCGA-VQ-A8PX-01	IFN-gamma Dominant (Immune C2)
TCGA-XF-A9SV-01	Wound Healing (Immune C1)
TCGA-24-1924-01	IFN-gamma Dominant (Immune C2)
TCGA-DX-A6BG-01	Wound Healing (Immune C1)
TCGA-E7-A6MF-01	Inflammatory (Immune C3)
TCGA-MM-A84U-01	Inflammatory (Immune C3)
TCGA-CV-6933-01	Wound Healing (Immune C1)
TCGA-E2-A1B0-01	Wound Healing (Immune C1)
TCGA-DS-A0VL-01	IFN-gamma Dominant (Immune C2)
TCGA-63-6202-01	IFN-gamma Dominant (Immune C2)
TCGA-BF-AAP2-01	IFN-gamma Dominant (Immune C2)
TCGA-46-3767-01	Wound Healing (Immune C1)
TCGA-2G-AALO-01	Inflammatory (Immune C3)
TCGA-EM-A4FQ-01	Inflammatory (Immune C3)
TCGA-B0-5095-01	Inflammatory (Immune C3)
TCGA-CI-6622-01	Wound Healing (Immune C1)
TCGA-BP-4167-01	Inflammatory (Immune C3)
TCGA-AG-3601-01	Wound Healing (Immune C1)
TCGA-ZP-A9D2-01	IFN-gamma Dominant (Immune C2)
TCGA-BH-A18R-01	Wound Healing (Immune C1)
TCGA-BA-7269-01	Wound Healing (Immune C1)
TCGA-CG-4466-01	Wound Healing (Immune C1)
TCGA-HU-A4G3-01	Wound Healing (Immune C1)
TCGA-OR-A5KY-01	Lymphocyte Depleted (Immune C4)
TCGA-NH-A6GC-01	Wound Healing (Immune C1)
TCGA-DX-A48K-01	Wound Healing (Immune C1)
TCGA-DD-A73B-01	Lymphocyte Depleted (Immune C4)
TCGA-AC-A4ZE-01	Inflammatory (Immune C3)
TCGA-P5-A5F1-01	Lymphocyte Depleted (Immune C4)
TCGA-DK-AA6X-01	IFN-gamma Dominant (Immune C2)
TCGA-EO-A22T-01	Wound Healing (Immune C1)
TCGA-BR-7722-01	Inflammatory (Immune C3)
TCGA-BI-A0VR-01	IFN-gamma Dominant (Immune C2)
TCGA-A6-3808-01	Wound Healing (Immune C1)
TCGA-33-AAS8-01	Wound Healing (Immune C1)
TCGA-AR-A24H-01	IFN-gamma Dominant (Immune C2)
TCGA-F4-6570-01	Wound Healing (Immune C1)
TCGA-E8-A432-01	Inflammatory (Immune C3)
TCGA-MZ-A5BI-01	IFN-gamma Dominant (Immune C2)
TCGA-EJ-8474-01	Inflammatory (Immune C3)
TCGA-DU-7011-01	Immunologically Quiet (Immune C5)
TCGA-06-5414-01	Lymphocyte Depleted (Immune C4)
TCGA-J9-A8CP-01	Inflammatory (Immune C3)
TCGA-ZF-A9R9-01	Inflammatory (Immune C3)
TCGA-P8-A6RX-01	Inflammatory (Immune C3)
TCGA-JY-A6FE-01	IFN-gamma Dominant (Immune C2)
TCGA-A8-A099-01	Inflammatory (Immune C3)
TCGA-CM-6679-01	Wound Healing (Immune C1)
TCGA-KL-8342-01	Inflammatory (Immune C3)
TCGA-XF-A8HB-01	TGF-beta Dominant (Immune C6)
TCGA-HT-8019-01	Immunologically Quiet (Immune C5)
TCGA-HV-A5A4-01	IFN-gamma Dominant (Immune C2)
TCGA-DC-6157-01	Wound Healing (Immune C1)
TCGA-NQ-A638-01	Wound Healing (Immune C1)
TCGA-VS-A9UU-01	IFN-gamma Dominant (Immune C2)
TCGA-66-2790-01	IFN-gamma Dominant (Immune C2)
TCGA-V1-A8WS-01	Wound Healing (Immune C1)
TCGA-CE-A3MD-01	Inflammatory (Immune C3)
TCGA-HU-A4GD-01	IFN-gamma Dominant (Immune C2)
TCGA-94-7033-01	IFN-gamma Dominant (Immune C2)
TCGA-VQ-A94U-01	Wound Healing (Immune C1)
TCGA-LK-A4O0-01	Wound Healing (Immune C1)
TCGA-XD-AAUG-01	Wound Healing (Immune C1)
TCGA-FV-A4ZP-01	Lymphocyte Depleted (Immune C4)
TCGA-KN-8435-01	Inflammatory (Immune C3)
TCGA-P5-A77X-01	Immunologically Quiet (Immune C5)
TCGA-NC-A5HI-01	Wound Healing (Immune C1)
TCGA-ZJ-AAXN-01	IFN-gamma Dominant (Immune C2)
TCGA-BP-4781-01	Inflammatory (Immune C3)
TCGA-CV-6937-01	Wound Healing (Immune C1)
TCGA-AJ-A3QS-01	IFN-gamma Dominant (Immune C2)
TCGA-DD-AACS-01	Lymphocyte Depleted (Immune C4)
TCGA-MT-A67F-01	IFN-gamma Dominant (Immune C2)
TCGA-VS-A9U6-01	IFN-gamma Dominant (Immune C2)
TCGA-EB-A6QZ-01	Lymphocyte Depleted (Immune C4)
TCGA-5P-A9KF-01	Inflammatory (Immune C3)
TCGA-EB-A1NK-01	Wound Healing (Immune C1)
TCGA-RY-A843-01	Immunologically Quiet (Immune C5)
TCGA-A8-A09R-01	Wound Healing (Immune C1)
TCGA-DK-AA6S-01	Wound Healing (Immune C1)
TCGA-V1-A9Z8-01	Inflammatory (Immune C3)
TCGA-DD-A4NK-01	Inflammatory (Immune C3)
TCGA-CM-4750-01	IFN-gamma Dominant (Immune C2)
TCGA-VQ-A8PJ-01	Wound Healing (Immune C1)
TCGA-KQ-A41S-01	Wound Healing (Immune C1)
TCGA-4Z-AA7O-01	Wound Healing (Immune C1)
TCGA-55-8507-01	Wound Healing (Immune C1)
TCGA-DJ-A3UN-01	Inflammatory (Immune C3)
TCGA-HW-7493-01	Immunologically Quiet (Immune C5)
TCGA-BG-A0MC-01	Inflammatory (Immune C3)
TCGA-D6-6516-01	IFN-gamma Dominant (Immune C2)
TCGA-C5-A2LX-01	IFN-gamma Dominant (Immune C2)
TCGA-CR-6471-01	IFN-gamma Dominant (Immune C2)
TCGA-VM-A8CA-01	Immunologically Quiet (Immune C5)
TCGA-D1-A17M-01	IFN-gamma Dominant (Immune C2)
TCGA-D8-A27G-01	Wound Healing (Immune C1)
TCGA-B0-5699-01	Inflammatory (Immune C3)
TCGA-AA-3845-01	IFN-gamma Dominant (Immune C2)
TCGA-A5-A0GH-01	Wound Healing (Immune C1)
TCGA-XQ-A8TB-01	Inflammatory (Immune C3)
TCGA-37-5819-01	Wound Healing (Immune C1)
TCGA-DU-7015-01	Immunologically Quiet (Immune C5)
TCGA-MQ-A4LJ-01	Wound Healing (Immune C1)
TCGA-C5-A1M8-01	IFN-gamma Dominant (Immune C2)
TCGA-C5-A7CJ-01	IFN-gamma Dominant (Immune C2)
TCGA-AA-3980-01	IFN-gamma Dominant (Immune C2)
TCGA-22-A5C4-01	Wound Healing (Immune C1)
TCGA-HB-A2OT-01	Lymphocyte Depleted (Immune C4)
TCGA-85-A4CL-01	Wound Healing (Immune C1)
TCGA-TM-A7C5-01	Immunologically Quiet (Immune C5)
TCGA-06-0184-01	Lymphocyte Depleted (Immune C4)
TCGA-ZF-AA56-01	IFN-gamma Dominant (Immune C2)
TCGA-BP-4801-01	Inflammatory (Immune C3)
TCGA-D8-A1XC-01	Inflammatory (Immune C3)
TCGA-DU-8162-01	Immunologically Quiet (Immune C5)
TCGA-TM-A84O-01	Immunologically Quiet (Immune C5)
TCGA-06-5410-01	Lymphocyte Depleted (Immune C4)
TCGA-DC-6158-01	IFN-gamma Dominant (Immune C2)
TCGA-HT-A4DS-01	Lymphocyte Depleted (Immune C4)
TCGA-69-8254-01	Inflammatory (Immune C3)
TCGA-AA-A00N-01	Wound Healing (Immune C1)
TCGA-EM-A3FM-01	Inflammatory (Immune C3)
TCGA-GH-A9DA-01	Wound Healing (Immune C1)
TCGA-TN-A7HL-01	IFN-gamma Dominant (Immune C2)
TCGA-3B-A9HT-01	IFN-gamma Dominant (Immune C2)
TCGA-CN-4742-01	IFN-gamma Dominant (Immune C2)
TCGA-AA-3984-01	IFN-gamma Dominant (Immune C2)
TCGA-FY-A3R7-01	Inflammatory (Immune C3)
TCGA-BH-A1FJ-01	IFN-gamma Dominant (Immune C2)
TCGA-DD-AACX-01	Lymphocyte Depleted (Immune C4)
TCGA-78-8640-01	IFN-gamma Dominant (Immune C2)
TCGA-DJ-A3UY-01	Inflammatory (Immune C3)
TCGA-EW-A1PE-01	IFN-gamma Dominant (Immune C2)
TCGA-E2-A1II-01	IFN-gamma Dominant (Immune C2)
TCGA-S3-AA14-01	Wound Healing (Immune C1)
TCGA-CR-7392-01	IFN-gamma Dominant (Immune C2)
TCGA-CV-7100-01	IFN-gamma Dominant (Immune C2)
TCGA-60-2714-01	IFN-gamma Dominant (Immune C2)
TCGA-2G-AAFO-01	IFN-gamma Dominant (Immune C2)
TCGA-AR-A5QP-01	Wound Healing (Immune C1)
TCGA-NF-A4WX-01	Wound Healing (Immune C1)
TCGA-K6-A3WQ-01	IFN-gamma Dominant (Immune C2)
TCGA-E9-A6HE-01	IFN-gamma Dominant (Immune C2)
TCGA-BR-8291-01	Inflammatory (Immune C3)
TCGA-DD-AADA-01	Inflammatory (Immune C3)
TCGA-TQ-A7RN-01	Immunologically Quiet (Immune C5)
TCGA-ZM-AA0B-01	IFN-gamma Dominant (Immune C2)
TCGA-GL-A9DE-01	Lymphocyte Depleted (Immune C4)
TCGA-QR-A70O-01	Inflammatory (Immune C3)
TCGA-BH-A0HI-01	Wound Healing (Immune C1)
TCGA-XE-AANI-01	Wound Healing (Immune C1)
TCGA-ET-A3DT-01	Inflammatory (Immune C3)
TCGA-F4-6806-01	Wound Healing (Immune C1)
TCGA-DD-A1EI-01	Wound Healing (Immune C1)
TCGA-AP-A0LG-01	Wound Healing (Immune C1)
TCGA-NH-A50U-01	IFN-gamma Dominant (Immune C2)
TCGA-BP-4790-01	Inflammatory (Immune C3)
TCGA-AX-A1C8-01	IFN-gamma Dominant (Immune C2)
TCGA-BP-5008-01	Inflammatory (Immune C3)
TCGA-P8-A6RY-01	Lymphocyte Depleted (Immune C4)
TCGA-AJ-A3BK-01	IFN-gamma Dominant (Immune C2)
TCGA-CR-6480-01	IFN-gamma Dominant (Immune C2)
TCGA-AA-3692-01	Wound Healing (Immune C1)
TCGA-AF-2693-01	Wound Healing (Immune C1)
TCGA-D5-6924-01	Wound Healing (Immune C1)
TCGA-28-2513-01	Lymphocyte Depleted (Immune C4)
TCGA-EW-A1P1-01	Wound Healing (Immune C1)
TCGA-AA-A01R-01	IFN-gamma Dominant (Immune C2)
TCGA-V4-A9EF-01	Lymphocyte Depleted (Immune C4)
TCGA-JU-AAVI-01	IFN-gamma Dominant (Immune C2)
TCGA-QR-A70R-01	Inflammatory (Immune C3)
TCGA-OL-A66P-01	IFN-gamma Dominant (Immune C2)
TCGA-NG-A4VW-01	Wound Healing (Immune C1)
TCGA-CG-4462-01	TGF-beta Dominant (Immune C6)
TCGA-A2-A1G4-01	Wound Healing (Immune C1)
TCGA-E2-A105-01	Wound Healing (Immune C1)
TCGA-55-7573-01	Inflammatory (Immune C3)
TCGA-N5-A4RA-01	Wound Healing (Immune C1)
TCGA-E6-A1LZ-01	Wound Healing (Immune C1)
TCGA-L5-A4OR-01	Wound Healing (Immune C1)
TCGA-EY-A2OM-01	Wound Healing (Immune C1)
TCGA-CV-A45W-01	IFN-gamma Dominant (Immune C2)
TCGA-EJ-5502-01	Inflammatory (Immune C3)
TCGA-B0-5085-01	Inflammatory (Immune C3)
TCGA-2L-AAQL-01	TGF-beta Dominant (Immune C6)
TCGA-D1-A17F-01	IFN-gamma Dominant (Immune C2)
TCGA-HC-8265-01	Wound Healing (Immune C1)
TCGA-AD-6965-01	Wound Healing (Immune C1)
TCGA-BJ-A3PR-01	IFN-gamma Dominant (Immune C2)
TCGA-SH-A7BD-01	IFN-gamma Dominant (Immune C2)
TCGA-H2-A422-01	Inflammatory (Immune C3)
TCGA-EY-A549-01	Inflammatory (Immune C3)
TCGA-DX-A6YU-01	TGF-beta Dominant (Immune C6)
TCGA-P5-A735-01	Immunologically Quiet (Immune C5)
TCGA-VQ-A928-01	Wound Healing (Immune C1)
TCGA-D5-6931-01	Wound Healing (Immune C1)
TCGA-DX-A6Z2-01	Inflammatory (Immune C3)
TCGA-BS-A0V6-01	IFN-gamma Dominant (Immune C2)
TCGA-BC-A10T-01	Wound Healing (Immune C1)
TCGA-AA-3872-01	Wound Healing (Immune C1)
TCGA-43-5668-01	IFN-gamma Dominant (Immune C2)
TCGA-R8-A6ML-01	Immunologically Quiet (Immune C5)
TCGA-FB-AAQ0-01	IFN-gamma Dominant (Immune C2)
TCGA-BF-AAP1-01	Lymphocyte Depleted (Immune C4)
TCGA-A2-A0EV-01	IFN-gamma Dominant (Immune C2)
TCGA-HT-7691-01	Immunologically Quiet (Immune C5)
TCGA-18-4083-01	Wound Healing (Immune C1)
TCGA-FG-A6J1-01	Lymphocyte Depleted (Immune C4)
TCGA-CV-7104-01	IFN-gamma Dominant (Immune C2)
TCGA-EO-A22S-01	Wound Healing (Immune C1)
TCGA-A8-A08A-01	Inflammatory (Immune C3)
TCGA-D1-A17B-01	Inflammatory (Immune C3)
TCGA-CD-8526-01	IFN-gamma Dominant (Immune C2)
TCGA-BR-7703-01	IFN-gamma Dominant (Immune C2)
TCGA-W8-A86G-01	Inflammatory (Immune C3)
TCGA-AL-3471-01	Inflammatory (Immune C3)
TCGA-MH-A854-01	Wound Healing (Immune C1)
TCGA-YF-AA3M-01	Wound Healing (Immune C1)
TCGA-76-4929-01	Lymphocyte Depleted (Immune C4)
TCGA-2Y-A9H6-01	Inflammatory (Immune C3)
TCGA-44-2656-01	IFN-gamma Dominant (Immune C2)
TCGA-A6-5656-01	Wound Healing (Immune C1)
TCGA-43-8115-01	Wound Healing (Immune C1)
TCGA-3A-A9IX-01	Inflammatory (Immune C3)
TCGA-EI-6884-01	Wound Healing (Immune C1)
TCGA-DU-6402-01	Lymphocyte Depleted (Immune C4)
TCGA-AG-3890-01	Wound Healing (Immune C1)
TCGA-Q1-A73P-01	IFN-gamma Dominant (Immune C2)
TCGA-39-5016-01	IFN-gamma Dominant (Immune C2)
TCGA-HT-7684-01	Immunologically Quiet (Immune C5)
TCGA-D8-A1XL-01	IFN-gamma Dominant (Immune C2)
TCGA-E8-A413-01	Inflammatory (Immune C3)
TCGA-BA-6871-01	IFN-gamma Dominant (Immune C2)
TCGA-HT-8104-01	Lymphocyte Depleted (Immune C4)
TCGA-CN-6017-01	IFN-gamma Dominant (Immune C2)
TCGA-CC-A7IH-01	Inflammatory (Immune C3)
TCGA-D7-A747-01	IFN-gamma Dominant (Immune C2)
TCGA-A4-7585-01	Inflammatory (Immune C3)
TCGA-TS-A7P6-01	Wound Healing (Immune C1)
TCGA-BG-A0W2-01	Wound Healing (Immune C1)
TCGA-DD-A4NG-01	Inflammatory (Immune C3)
TCGA-BP-5170-01	Inflammatory (Immune C3)
TCGA-FN-7833-01	Lymphocyte Depleted (Immune C4)
TCGA-KN-8436-01	Inflammatory (Immune C3)
TCGA-C5-A8XK-01	IFN-gamma Dominant (Immune C2)
TCGA-43-A474-01	Wound Healing (Immune C1)
TCGA-HT-7473-01	Lymphocyte Depleted (Immune C4)
TCGA-06-0645-01	Lymphocyte Depleted (Immune C4)
TCGA-33-AASI-01	Wound Healing (Immune C1)
TCGA-DM-A1DA-01	Wound Healing (Immune C1)
TCGA-IB-7647-01	Wound Healing (Immune C1)
TCGA-BJ-A2N9-01	Inflammatory (Immune C3)
TCGA-41-2572-01	Lymphocyte Depleted (Immune C4)
TCGA-AG-3885-01	Inflammatory (Immune C3)
TCGA-CF-A7I0-01	Wound Healing (Immune C1)
TCGA-EK-A3GN-01	IFN-gamma Dominant (Immune C2)
TCGA-WJ-A86L-01	Lymphocyte Depleted (Immune C4)
TCGA-DX-AB2X-01	Lymphocyte Depleted (Immune C4)
TCGA-MJ-A850-01	Wound Healing (Immune C1)
TCGA-C5-A907-01	IFN-gamma Dominant (Immune C2)
TCGA-49-4506-01	IFN-gamma Dominant (Immune C2)
TCGA-B0-5713-01	Inflammatory (Immune C3)
TCGA-BQ-5877-01	Inflammatory (Immune C3)
TCGA-D1-A160-01	Wound Healing (Immune C1)
TCGA-BR-6564-01	IFN-gamma Dominant (Immune C2)
TCGA-B2-5633-01	Inflammatory (Immune C3)
TCGA-BH-A0BZ-01	IFN-gamma Dominant (Immune C2)
TCGA-XF-AAMX-01	Wound Healing (Immune C1)
TCGA-OR-A5LR-01	Inflammatory (Immune C3)
TCGA-A2-A0ER-01	Wound Healing (Immune C1)
TCGA-IG-A8O2-01	IFN-gamma Dominant (Immune C2)
TCGA-AX-A1C7-01	IFN-gamma Dominant (Immune C2)
TCGA-TQ-A7RU-01	Immunologically Quiet (Immune C5)
TCGA-BP-4982-01	Inflammatory (Immune C3)
TCGA-JY-A938-01	IFN-gamma Dominant (Immune C2)
TCGA-XF-A9T8-01	IFN-gamma Dominant (Immune C2)
TCGA-2G-AAG0-01	IFN-gamma Dominant (Immune C2)
TCGA-EO-A22X-01	Wound Healing (Immune C1)
TCGA-DD-A4ND-01	Inflammatory (Immune C3)
TCGA-B8-5162-01	Inflammatory (Immune C3)
TCGA-66-2785-01	IFN-gamma Dominant (Immune C2)
TCGA-25-1630-01	Lymphocyte Depleted (Immune C4)
TCGA-OL-A66K-01	Inflammatory (Immune C3)
TCGA-P4-A5E8-01	Inflammatory (Immune C3)
TCGA-Q9-A6FW-01	Wound Healing (Immune C1)
TCGA-IN-7806-01	Inflammatory (Immune C3)
TCGA-36-1574-01	IFN-gamma Dominant (Immune C2)
TCGA-QK-A8Z8-01	IFN-gamma Dominant (Immune C2)
TCGA-CQ-5326-01	IFN-gamma Dominant (Immune C2)
TCGA-DB-A4XF-01	Immunologically Quiet (Immune C5)
TCGA-2Y-A9H2-01	Inflammatory (Immune C3)
TCGA-C5-A7CM-01	Wound Healing (Immune C1)
TCGA-4K-AAAL-01	IFN-gamma Dominant (Immune C2)
TCGA-A4-A5Y1-01	Inflammatory (Immune C3)
TCGA-56-8201-01	Wound Healing (Immune C1)
TCGA-G9-6342-01	Inflammatory (Immune C3)
TCGA-KU-A66T-01	IFN-gamma Dominant (Immune C2)
TCGA-DD-AAVW-01	Inflammatory (Immune C3)
TCGA-CJ-4905-01	Inflammatory (Immune C3)
TCGA-EP-A2KC-01	Lymphocyte Depleted (Immune C4)
TCGA-MT-A51W-01	IFN-gamma Dominant (Immune C2)
TCGA-LN-A7HY-01	Wound Healing (Immune C1)
TCGA-FY-A3R8-01	Inflammatory (Immune C3)
TCGA-WB-A81H-01	Inflammatory (Immune C3)
TCGA-G7-6790-01	Inflammatory (Immune C3)
TCGA-XY-A89B-01	IFN-gamma Dominant (Immune C2)
TCGA-CC-A7IL-01	Lymphocyte Depleted (Immune C4)
TCGA-EW-A1OX-01	Lymphocyte Depleted (Immune C4)
TCGA-EL-A3T1-01	IFN-gamma Dominant (Immune C2)
TCGA-55-A48X-01	Inflammatory (Immune C3)
TCGA-YZ-A984-01	Inflammatory (Immune C3)
TCGA-BP-5174-01	Inflammatory (Immune C3)
TCGA-KN-8427-01	Wound Healing (Immune C1)
TCGA-QR-A705-01	Inflammatory (Immune C3)
TCGA-20-1684-01	IFN-gamma Dominant (Immune C2)
TCGA-N8-A4PI-01	Lymphocyte Depleted (Immune C4)
TCGA-05-4402-01	IFN-gamma Dominant (Immune C2)
TCGA-2G-AAH4-01	Wound Healing (Immune C1)
TCGA-CX-7086-01	IFN-gamma Dominant (Immune C2)
TCGA-ET-A25L-01	Inflammatory (Immune C3)
TCGA-UZ-A9PZ-01	Inflammatory (Immune C3)
TCGA-AG-3881-01	Wound Healing (Immune C1)
TCGA-A8-A0A9-01	IFN-gamma Dominant (Immune C2)
TCGA-DE-A2OL-01	Inflammatory (Immune C3)
TCGA-G7-A4TM-01	Inflammatory (Immune C3)
TCGA-BQ-7060-01	Inflammatory (Immune C3)
TCGA-DD-A4NS-01	Inflammatory (Immune C3)
TCGA-B0-4697-01	Inflammatory (Immune C3)
TCGA-QR-A6GO-01	Lymphocyte Depleted (Immune C4)
TCGA-AX-A3FS-01	IFN-gamma Dominant (Immune C2)
TCGA-S9-A6WP-01	Immunologically Quiet (Immune C5)
TCGA-BH-A1FB-01	Inflammatory (Immune C3)
TCGA-44-8119-01	Wound Healing (Immune C1)
TCGA-BP-4759-01	TGF-beta Dominant (Immune C6)
TCGA-FG-A713-01	Immunologically Quiet (Immune C5)
TCGA-DI-A1BY-01	Wound Healing (Immune C1)
TCGA-V4-A9EZ-01	Lymphocyte Depleted (Immune C4)
TCGA-VS-A9V2-01	IFN-gamma Dominant (Immune C2)
TCGA-VS-A94Y-01	Wound Healing (Immune C1)
TCGA-F4-6461-01	Wound Healing (Immune C1)
TCGA-90-A4EE-01	IFN-gamma Dominant (Immune C2)
TCGA-C5-A8ZZ-01	IFN-gamma Dominant (Immune C2)
TCGA-MQ-A6BS-01	Inflammatory (Immune C3)
TCGA-B5-A11G-01	IFN-gamma Dominant (Immune C2)
TCGA-HT-A5RA-01	Lymphocyte Depleted (Immune C4)
TCGA-E1-A7YL-01	Lymphocyte Depleted (Immune C4)
TCGA-AO-A0JC-01	IFN-gamma Dominant (Immune C2)
TCGA-JW-A852-01	IFN-gamma Dominant (Immune C2)
TCGA-BB-4224-01	IFN-gamma Dominant (Immune C2)
TCGA-CJ-6030-01	Inflammatory (Immune C3)
TCGA-A3-3319-01	Inflammatory (Immune C3)
TCGA-VQ-AA68-01	IFN-gamma Dominant (Immune C2)
TCGA-UD-AAC5-01	Wound Healing (Immune C1)
TCGA-DD-AADI-01	IFN-gamma Dominant (Immune C2)
TCGA-V4-A9F0-01	Inflammatory (Immune C3)
TCGA-FC-7961-01	Inflammatory (Immune C3)
TCGA-CC-A7IG-01	Wound Healing (Immune C1)
TCGA-MR-A8JO-01	Inflammatory (Immune C3)
TCGA-GC-A3YS-01	Wound Healing (Immune C1)
TCGA-OR-A5LG-01	Lymphocyte Depleted (Immune C4)
TCGA-VD-A8KH-01	Lymphocyte Depleted (Immune C4)
TCGA-CR-7379-01	Wound Healing (Immune C1)
TCGA-CJ-4918-01	Inflammatory (Immune C3)
TCGA-A8-A07J-01	TGF-beta Dominant (Immune C6)
TCGA-E9-A229-01	IFN-gamma Dominant (Immune C2)
TCGA-L5-A4OU-01	IFN-gamma Dominant (Immune C2)
TCGA-X9-A971-01	Lymphocyte Depleted (Immune C4)
TCGA-D6-6826-01	Wound Healing (Immune C1)
TCGA-A2-A0SX-01	IFN-gamma Dominant (Immune C2)
TCGA-CU-A0YO-01	Wound Healing (Immune C1)
TCGA-KK-A8I4-01	Inflammatory (Immune C3)
TCGA-UZ-A9PM-01	Inflammatory (Immune C3)
TCGA-B8-5545-01	Inflammatory (Immune C3)
TCGA-US-A776-01	Wound Healing (Immune C1)
TCGA-BR-8484-01	IFN-gamma Dominant (Immune C2)
TCGA-55-7724-01	IFN-gamma Dominant (Immune C2)
TCGA-F4-6703-01	Wound Healing (Immune C1)
TCGA-HU-A4G8-01	IFN-gamma Dominant (Immune C2)
TCGA-BC-A10W-01	Lymphocyte Depleted (Immune C4)
TCGA-DX-AB2Q-01	Wound Healing (Immune C1)
TCGA-44-6776-01	Inflammatory (Immune C3)
TCGA-49-4514-01	Wound Healing (Immune C1)
TCGA-05-4396-01	Inflammatory (Immune C3)
TCGA-AA-3864-01	Wound Healing (Immune C1)
TCGA-EJ-7789-01	Lymphocyte Depleted (Immune C4)
TCGA-85-A50Z-01	Wound Healing (Immune C1)
TCGA-B2-3923-01	Inflammatory (Immune C3)
TCGA-55-8204-01	Wound Healing (Immune C1)
TCGA-BP-5183-01	Inflammatory (Immune C3)
TCGA-V4-A9EA-01	Lymphocyte Depleted (Immune C4)
TCGA-QS-A5YR-01	IFN-gamma Dominant (Immune C2)
TCGA-L4-A4E6-01	Inflammatory (Immune C3)
TCGA-L5-A8NJ-01	IFN-gamma Dominant (Immune C2)
TCGA-DX-A1L0-01	TGF-beta Dominant (Immune C6)
TCGA-BH-A0AW-01	IFN-gamma Dominant (Immune C2)
TCGA-VS-A9UJ-01	Wound Healing (Immune C1)
TCGA-2G-AAF6-01	IFN-gamma Dominant (Immune C2)
TCGA-B5-A11P-01	Wound Healing (Immune C1)
TCGA-XD-AAUH-01	Inflammatory (Immune C3)
TCGA-AX-A3FW-01	IFN-gamma Dominant (Immune C2)
TCGA-BH-A2L8-01	IFN-gamma Dominant (Immune C2)
TCGA-HU-A4GC-01	IFN-gamma Dominant (Immune C2)
TCGA-EB-A5SE-01	Wound Healing (Immune C1)
TCGA-HT-A5R9-01	Lymphocyte Depleted (Immune C4)
TCGA-AA-3492-01	Wound Healing (Immune C1)
TCGA-A3-3362-01	Inflammatory (Immune C3)
TCGA-CS-5396-01	Immunologically Quiet (Immune C5)
TCGA-DX-AB32-01	IFN-gamma Dominant (Immune C2)
TCGA-BB-7866-01	IFN-gamma Dominant (Immune C2)
TCGA-HD-7832-01	IFN-gamma Dominant (Immune C2)
TCGA-Y8-A895-01	Inflammatory (Immune C3)
TCGA-A8-A08I-01	IFN-gamma Dominant (Immune C2)
TCGA-BH-A0HP-01	Wound Healing (Immune C1)
TCGA-14-0790-01	Lymphocyte Depleted (Immune C4)
TCGA-BH-A0BS-01	Lymphocyte Depleted (Immune C4)
TCGA-DJ-A4UL-01	Inflammatory (Immune C3)
TCGA-CD-A48C-01	Wound Healing (Immune C1)
TCGA-AA-3544-01	IFN-gamma Dominant (Immune C2)
TCGA-TS-A7P1-01	Wound Healing (Immune C1)
TCGA-75-6205-01	IFN-gamma Dominant (Immune C2)
TCGA-FP-8099-01	IFN-gamma Dominant (Immune C2)
TCGA-ZJ-AAXI-01	IFN-gamma Dominant (Immune C2)
TCGA-B6-A0IG-01	IFN-gamma Dominant (Immune C2)
TCGA-XN-A8T5-01	Inflammatory (Immune C3)
TCGA-ZG-A9M4-01	Inflammatory (Immune C3)
TCGA-EJ-7793-01	Inflammatory (Immune C3)
TCGA-AA-3496-01	Wound Healing (Immune C1)
TCGA-QR-A7IN-01	Inflammatory (Immune C3)
TCGA-ZF-AA4N-01	Wound Healing (Immune C1)
TCGA-XF-AAMG-01	Wound Healing (Immune C1)
TCGA-ZH-A8Y1-01	Inflammatory (Immune C3)
TCGA-DJ-A13T-01	Inflammatory (Immune C3)
TCGA-QR-A6GT-01	TGF-beta Dominant (Immune C6)
TCGA-AK-3451-01	IFN-gamma Dominant (Immune C2)
TCGA-CJ-4923-01	IFN-gamma Dominant (Immune C2)
TCGA-FV-A3R2-01	Lymphocyte Depleted (Immune C4)
TCGA-CZ-5987-01	Inflammatory (Immune C3)
TCGA-98-A538-01	Wound Healing (Immune C1)
TCGA-ET-A3BO-01	Inflammatory (Immune C3)
TCGA-KP-A3W0-01	Wound Healing (Immune C1)
TCGA-CV-6436-01	IFN-gamma Dominant (Immune C2)
TCGA-EJ-7782-01	Inflammatory (Immune C3)
TCGA-HW-8322-01	Immunologically Quiet (Immune C5)
TCGA-BP-4159-01	TGF-beta Dominant (Immune C6)
TCGA-Q1-A6DT-01	Wound Healing (Immune C1)
TCGA-85-6561-01	Wound Healing (Immune C1)
TCGA-L5-A8NN-01	IFN-gamma Dominant (Immune C2)
TCGA-ZF-A9RL-01	Lymphocyte Depleted (Immune C4)
TCGA-25-1633-01	IFN-gamma Dominant (Immune C2)
TCGA-25-2396-01	IFN-gamma Dominant (Immune C2)
TCGA-BR-7715-01	Wound Healing (Immune C1)
TCGA-BH-A0DO-01	Inflammatory (Immune C3)
TCGA-HC-A8CY-01	Lymphocyte Depleted (Immune C4)
TCGA-X6-A8C5-01	Inflammatory (Immune C3)
TCGA-DY-A0XA-01	Wound Healing (Immune C1)
TCGA-DM-A28E-01	Wound Healing (Immune C1)
TCGA-S9-A6U9-01	Immunologically Quiet (Immune C5)
TCGA-5R-AA1C-01	Lymphocyte Depleted (Immune C4)
TCGA-CK-6747-01	Wound Healing (Immune C1)
TCGA-WB-A819-01	Lymphocyte Depleted (Immune C4)
TCGA-Y8-A8S1-01	TGF-beta Dominant (Immune C6)
TCGA-G9-7523-01	Inflammatory (Immune C3)
TCGA-CJ-5680-01	Inflammatory (Immune C3)
TCGA-34-5234-01	IFN-gamma Dominant (Immune C2)
TCGA-A6-5667-01	Wound Healing (Immune C1)
TCGA-HT-7676-01	Immunologically Quiet (Immune C5)
TCGA-LN-A4A4-01	Wound Healing (Immune C1)
TCGA-XF-A9T0-01	Wound Healing (Immune C1)
TCGA-FW-A5DX-01	Lymphocyte Depleted (Immune C4)
TCGA-62-A46O-01	IFN-gamma Dominant (Immune C2)
TCGA-G3-AAV1-01	Lymphocyte Depleted (Immune C4)
TCGA-HT-7469-01	Lymphocyte Depleted (Immune C4)
TCGA-56-7822-01	Wound Healing (Immune C1)
TCGA-56-A62T-01	IFN-gamma Dominant (Immune C2)
TCGA-LL-A73Y-01	Inflammatory (Immune C3)
TCGA-BC-A10X-01	Inflammatory (Immune C3)
TCGA-EA-A3QE-01	IFN-gamma Dominant (Immune C2)
TCGA-BH-A0DK-01	IFN-gamma Dominant (Immune C2)
TCGA-GC-A4ZW-01	Wound Healing (Immune C1)
TCGA-K4-A4AC-01	IFN-gamma Dominant (Immune C2)
TCGA-85-A4JB-01	IFN-gamma Dominant (Immune C2)
TCGA-62-A472-01	IFN-gamma Dominant (Immune C2)
TCGA-NJ-A55R-01	Inflammatory (Immune C3)
TCGA-23-1026-01	IFN-gamma Dominant (Immune C2)
TCGA-VQ-A8E3-01	IFN-gamma Dominant (Immune C2)
TCGA-F5-6702-01	Wound Healing (Immune C1)
TCGA-VS-A9UQ-01	Wound Healing (Immune C1)
TCGA-BH-A0BG-01	IFN-gamma Dominant (Immune C2)
TCGA-AJ-A23N-01	Wound Healing (Immune C1)
TCGA-W5-AA34-01	Inflammatory (Immune C3)
TCGA-CA-5255-01	Wound Healing (Immune C1)
TCGA-93-A4JP-01	Lymphocyte Depleted (Immune C4)
TCGA-CK-4947-01	Wound Healing (Immune C1)
TCGA-FD-A3B3-01	IFN-gamma Dominant (Immune C2)
TCGA-IE-A6BZ-01	Inflammatory (Immune C3)
TCGA-FU-A3HY-01	Wound Healing (Immune C1)
TCGA-2G-AAGS-01	Wound Healing (Immune C1)
TCGA-V1-A8MU-01	Inflammatory (Immune C3)
TCGA-G6-A8L8-01	Inflammatory (Immune C3)
TCGA-KP-A3W1-01	IFN-gamma Dominant (Immune C2)
TCGA-CV-A6JZ-01	IFN-gamma Dominant (Immune C2)
TCGA-32-2634-01	Lymphocyte Depleted (Immune C4)
TCGA-BS-A0U7-01	Wound Healing (Immune C1)
TCGA-62-8395-01	Inflammatory (Immune C3)
TCGA-24-2261-01	IFN-gamma Dominant (Immune C2)
TCGA-AN-A0AT-01	Wound Healing (Immune C1)
TCGA-13-0800-01	IFN-gamma Dominant (Immune C2)
TCGA-3U-A98H-01	TGF-beta Dominant (Immune C6)
TCGA-77-8136-01	IFN-gamma Dominant (Immune C2)
TCGA-D1-A2G0-01	Wound Healing (Immune C1)
TCGA-ET-A40P-01	Inflammatory (Immune C3)
TCGA-CW-5589-01	Inflammatory (Immune C3)
TCGA-VQ-A8E0-01	Wound Healing (Immune C1)
TCGA-66-2756-01	Wound Healing (Immune C1)
TCGA-61-1998-01	Lymphocyte Depleted (Immune C4)
TCGA-23-1029-01	IFN-gamma Dominant (Immune C2)
TCGA-95-7567-01	IFN-gamma Dominant (Immune C2)
TCGA-E2-A14U-01	Inflammatory (Immune C3)
TCGA-AD-6888-01	Wound Healing (Immune C1)
TCGA-KB-A93G-01	Wound Healing (Immune C1)
TCGA-F4-6809-01	Wound Healing (Immune C1)
TCGA-A3-3385-01	Inflammatory (Immune C3)
TCGA-VS-A9UV-01	Wound Healing (Immune C1)
TCGA-50-5051-01	Wound Healing (Immune C1)
TCGA-BP-5000-01	Inflammatory (Immune C3)
TCGA-CN-A63U-01	IFN-gamma Dominant (Immune C2)
TCGA-AA-3502-01	Wound Healing (Immune C1)
TCGA-HT-7478-01	Lymphocyte Depleted (Immune C4)
TCGA-5P-A9K6-01	Inflammatory (Immune C3)
TCGA-VS-A8EG-01	IFN-gamma Dominant (Immune C2)
TCGA-IZ-8195-01	Inflammatory (Immune C3)
TCGA-43-8116-01	Wound Healing (Immune C1)
TCGA-MW-A4EC-01	Inflammatory (Immune C3)
TCGA-P3-A6T2-01	IFN-gamma Dominant (Immune C2)
TCGA-A3-3343-01	Inflammatory (Immune C3)
TCGA-L5-A4OM-01	Wound Healing (Immune C1)
TCGA-WB-A80Q-01	Inflammatory (Immune C3)
TCGA-BK-A13B-01	Wound Healing (Immune C1)
TCGA-EX-A69L-01	IFN-gamma Dominant (Immune C2)
TCGA-FJ-A871-01	Wound Healing (Immune C1)
TCGA-WB-A817-01	Inflammatory (Immune C3)
TCGA-55-A48Y-01	Wound Healing (Immune C1)
TCGA-BJ-A45F-01	Inflammatory (Immune C3)
TCGA-AA-3525-01	Wound Healing (Immune C1)
TCGA-AK-3447-01	Lymphocyte Depleted (Immune C4)
TCGA-Q1-A73O-01	IFN-gamma Dominant (Immune C2)
TCGA-D5-6532-01	Wound Healing (Immune C1)
TCGA-QR-A70J-01	IFN-gamma Dominant (Immune C2)
TCGA-CC-A9FU-01	Wound Healing (Immune C1)
TCGA-VS-A8QC-01	IFN-gamma Dominant (Immune C2)
TCGA-86-A456-01	IFN-gamma Dominant (Immune C2)
TCGA-33-AASB-01	Wound Healing (Immune C1)
TCGA-EA-A5ZE-01	IFN-gamma Dominant (Immune C2)
TCGA-XT-AASU-01	Wound Healing (Immune C1)
TCGA-FE-A22Z-01	Inflammatory (Immune C3)
TCGA-CV-7429-01	IFN-gamma Dominant (Immune C2)
TCGA-RW-A8AZ-01	Lymphocyte Depleted (Immune C4)
TCGA-50-5068-01	IFN-gamma Dominant (Immune C2)
TCGA-AG-A00Y-01	IFN-gamma Dominant (Immune C2)
TCGA-NJ-A55A-01	Inflammatory (Immune C3)
TCGA-ZS-A9CF-01	Lymphocyte Depleted (Immune C4)
TCGA-A4-8516-01	Lymphocyte Depleted (Immune C4)
TCGA-56-7580-01	Wound Healing (Immune C1)
TCGA-E8-A416-01	Inflammatory (Immune C3)
TCGA-S4-A8RM-01	Inflammatory (Immune C3)
TCGA-DU-A5TW-01	Immunologically Quiet (Immune C5)
TCGA-DX-AB2S-01	IFN-gamma Dominant (Immune C2)
TCGA-A5-A0R9-01	Wound Healing (Immune C1)
TCGA-IB-7890-01	Wound Healing (Immune C1)
TCGA-GD-A3OP-01	Inflammatory (Immune C3)
TCGA-90-7769-01	Wound Healing (Immune C1)
TCGA-CR-6467-01	IFN-gamma Dominant (Immune C2)
TCGA-S9-A6TX-01	Immunologically Quiet (Immune C5)
TCGA-B5-A0K8-01	IFN-gamma Dominant (Immune C2)
TCGA-IG-A97H-01	IFN-gamma Dominant (Immune C2)
TCGA-37-4135-01	IFN-gamma Dominant (Immune C2)
TCGA-RY-A83Z-01	Lymphocyte Depleted (Immune C4)
TCGA-IG-A5B8-01	IFN-gamma Dominant (Immune C2)
TCGA-JX-A5QV-01	IFN-gamma Dominant (Immune C2)
TCGA-AA-3930-01	IFN-gamma Dominant (Immune C2)
TCGA-BR-8683-01	IFN-gamma Dominant (Immune C2)
TCGA-DX-A8BQ-01	IFN-gamma Dominant (Immune C2)
TCGA-EW-A1P5-01	IFN-gamma Dominant (Immune C2)
TCGA-DJ-A13W-01	Lymphocyte Depleted (Immune C4)
TCGA-QR-A6GS-01	Inflammatory (Immune C3)
TCGA-FD-A3SL-01	Wound Healing (Immune C1)
TCGA-ET-A39L-01	Inflammatory (Immune C3)
TCGA-BH-A1FN-01	IFN-gamma Dominant (Immune C2)
TCGA-TS-A8AF-01	Wound Healing (Immune C1)
TCGA-EK-A2GZ-01	Wound Healing (Immune C1)
TCGA-N5-A4RM-01	Wound Healing (Immune C1)
TCGA-AZ-6600-01	Wound Healing (Immune C1)
TCGA-MM-A564-01	Inflammatory (Immune C3)
TCGA-E9-A3X8-01	Wound Healing (Immune C1)
TCGA-J4-A6G3-01	Inflammatory (Immune C3)
TCGA-51-4079-01	Wound Healing (Immune C1)
TCGA-DQ-7596-01	IFN-gamma Dominant (Immune C2)
TCGA-HZ-8002-01	Inflammatory (Immune C3)
TCGA-3A-A9IH-01	IFN-gamma Dominant (Immune C2)
TCGA-B5-A3FC-01	IFN-gamma Dominant (Immune C2)
TCGA-BJ-A0ZC-01	Inflammatory (Immune C3)
TCGA-98-8020-01	Wound Healing (Immune C1)
TCGA-CV-5970-01	IFN-gamma Dominant (Immune C2)
TCGA-DX-AB2G-01	TGF-beta Dominant (Immune C6)
TCGA-A7-A4SE-01	IFN-gamma Dominant (Immune C2)
TCGA-A1-A0SJ-01	Wound Healing (Immune C1)
TCGA-J2-A4AG-01	Inflammatory (Immune C3)
TCGA-EI-6510-01	Wound Healing (Immune C1)
TCGA-G4-6588-01	Wound Healing (Immune C1)
TCGA-RC-A7S9-01	Lymphocyte Depleted (Immune C4)
TCGA-22-5471-01	IFN-gamma Dominant (Immune C2)
TCGA-E2-A570-01	Wound Healing (Immune C1)
TCGA-CZ-5466-01	Inflammatory (Immune C3)
TCGA-CV-7425-01	IFN-gamma Dominant (Immune C2)
TCGA-EK-A2R9-01	IFN-gamma Dominant (Immune C2)
TCGA-QR-A6H4-01	Lymphocyte Depleted (Immune C4)
TCGA-BH-A201-01	Wound Healing (Immune C1)
TCGA-66-2744-01	IFN-gamma Dominant (Immune C2)
TCGA-61-2016-01	IFN-gamma Dominant (Immune C2)
TCGA-CN-4733-01	IFN-gamma Dominant (Immune C2)
TCGA-IR-A3LL-01	IFN-gamma Dominant (Immune C2)
TCGA-05-4405-01	Inflammatory (Immune C3)
TCGA-06-0125-01	Lymphocyte Depleted (Immune C4)
TCGA-V4-A9E5-01	Lymphocyte Depleted (Immune C4)
TCGA-DD-AA3A-01	Wound Healing (Immune C1)
TCGA-RW-A68A-01	Lymphocyte Depleted (Immune C4)
TCGA-AG-A036-01	Wound Healing (Immune C1)
TCGA-D1-A103-01	IFN-gamma Dominant (Immune C2)
TCGA-A5-A0R6-01	IFN-gamma Dominant (Immune C2)
TCGA-Y8-A8RZ-01	Lymphocyte Depleted (Immune C4)
TCGA-CR-5243-01	IFN-gamma Dominant (Immune C2)
TCGA-CZ-5469-01	Wound Healing (Immune C1)
TCGA-B6-A0RP-01	Inflammatory (Immune C3)
TCGA-D8-A27V-01	Inflammatory (Immune C3)
TCGA-ZF-AA4V-01	IFN-gamma Dominant (Immune C2)
TCGA-50-5944-01	Inflammatory (Immune C3)
TCGA-RD-A8N1-01	IFN-gamma Dominant (Immune C2)
TCGA-BR-8687-01	Wound Healing (Immune C1)
TCGA-OR-A5JV-01	Immunologically Quiet (Immune C5)
TCGA-ED-A7PY-01	Inflammatory (Immune C3)
TCGA-EM-A2CO-01	Inflammatory (Immune C3)
TCGA-BR-A4IY-01	IFN-gamma Dominant (Immune C2)
TCGA-50-6673-01	TGF-beta Dominant (Immune C6)
TCGA-V1-A9OQ-01	Inflammatory (Immune C3)
TCGA-FG-A6IZ-01	Immunologically Quiet (Immune C5)
TCGA-C5-A1M5-01	IFN-gamma Dominant (Immune C2)
TCGA-DQ-7592-01	IFN-gamma Dominant (Immune C2)
TCGA-CR-7372-01	IFN-gamma Dominant (Immune C2)
TCGA-B5-A1N2-01	IFN-gamma Dominant (Immune C2)
TCGA-YL-A9WI-01	Lymphocyte Depleted (Immune C4)
TCGA-EM-A2OZ-01	Inflammatory (Immune C3)
TCGA-55-7727-01	IFN-gamma Dominant (Immune C2)
TCGA-QR-A6H0-01	Inflammatory (Immune C3)
TCGA-CS-4941-01	Lymphocyte Depleted (Immune C4)
TCGA-A1-A0SE-01	Wound Healing (Immune C1)
TCGA-OU-A5PI-01	Lymphocyte Depleted (Immune C4)
TCGA-A4-7996-01	Inflammatory (Immune C3)
TCGA-77-8153-01	Wound Healing (Immune C1)
TCGA-MS-A51U-01	TGF-beta Dominant (Immune C6)
TCGA-L5-A88Y-01	Inflammatory (Immune C3)
TCGA-FY-A3WA-01	Inflammatory (Immune C3)
TCGA-QS-A8F1-01	Inflammatory (Immune C3)
TCGA-G3-A25S-01	Lymphocyte Depleted (Immune C4)
TCGA-ER-A19K-01	Lymphocyte Depleted (Immune C4)
TCGA-EM-A1CS-01	Inflammatory (Immune C3)
TCGA-EL-A3ZM-01	IFN-gamma Dominant (Immune C2)
TCGA-DJ-A13X-01	Inflammatory (Immune C3)
TCGA-DX-A1L3-01	Inflammatory (Immune C3)
TCGA-2Z-A9JN-01	Inflammatory (Immune C3)
TCGA-AR-A1AM-01	Wound Healing (Immune C1)
TCGA-HT-8113-01	Lymphocyte Depleted (Immune C4)
TCGA-13-0890-01	IFN-gamma Dominant (Immune C2)
TCGA-VF-A8AE-01	IFN-gamma Dominant (Immune C2)
TCGA-DH-A7UT-01	Immunologically Quiet (Immune C5)
TCGA-D1-A16F-01	Wound Healing (Immune C1)
TCGA-CK-6751-01	Wound Healing (Immune C1)
TCGA-CV-7238-01	IFN-gamma Dominant (Immune C2)
TCGA-EL-A3T7-01	Inflammatory (Immune C3)
TCGA-SN-A6IS-01	IFN-gamma Dominant (Immune C2)
TCGA-B0-5075-01	Inflammatory (Immune C3)
TCGA-DU-5851-01	Immunologically Quiet (Immune C5)
TCGA-CN-5367-01	IFN-gamma Dominant (Immune C2)
TCGA-DX-A3LS-01	TGF-beta Dominant (Immune C6)
TCGA-86-8279-01	Wound Healing (Immune C1)
TCGA-W2-A7HB-01	Immunologically Quiet (Immune C5)
TCGA-E7-A6MD-01	Wound Healing (Immune C1)
TCGA-CR-5250-01	Inflammatory (Immune C3)
TCGA-B0-5100-01	Inflammatory (Immune C3)
TCGA-EJ-7218-01	Inflammatory (Immune C3)
TCGA-XK-AAJR-01	Inflammatory (Immune C3)
TCGA-55-A494-01	Inflammatory (Immune C3)
TCGA-BP-4775-01	Inflammatory (Immune C3)
TCGA-2G-AALF-01	Wound Healing (Immune C1)
TCGA-ET-A3BT-01	Inflammatory (Immune C3)
TCGA-61-2000-01	IFN-gamma Dominant (Immune C2)
TCGA-A4-7288-01	Inflammatory (Immune C3)
TCGA-BR-4369-01	Wound Healing (Immune C1)
TCGA-B0-5400-01	Inflammatory (Immune C3)
TCGA-G4-6317-01	Wound Healing (Immune C1)
TCGA-25-2404-01	IFN-gamma Dominant (Immune C2)
TCGA-CV-7437-01	Wound Healing (Immune C1)
TCGA-55-7913-01	Wound Healing (Immune C1)
TCGA-K7-A5RG-01	IFN-gamma Dominant (Immune C2)
TCGA-QR-A707-01	Lymphocyte Depleted (Immune C4)
TCGA-EY-A1GW-01	Lymphocyte Depleted (Immune C4)
TCGA-C5-A7X8-01	Wound Healing (Immune C1)
TCGA-B0-5120-01	Inflammatory (Immune C3)
TCGA-2G-AAKM-01	Wound Healing (Immune C1)
TCGA-SG-A6Z4-01	Lymphocyte Depleted (Immune C4)
TCGA-VD-AA8R-01	Immunologically Quiet (Immune C5)
TCGA-3B-A9HZ-01	Inflammatory (Immune C3)
TCGA-CJ-4873-01	Inflammatory (Immune C3)
TCGA-SX-A7SL-01	Lymphocyte Depleted (Immune C4)
TCGA-BH-A1EX-01	TGF-beta Dominant (Immune C6)
TCGA-HW-8321-01	Immunologically Quiet (Immune C5)
TCGA-G4-6309-01	Wound Healing (Immune C1)
TCGA-KL-8340-01	Inflammatory (Immune C3)
TCGA-EZ-7264-01	Immunologically Quiet (Immune C5)
TCGA-E8-A433-01	Inflammatory (Immune C3)
TCGA-EJ-7791-01	Inflammatory (Immune C3)
TCGA-IN-A6RR-01	IFN-gamma Dominant (Immune C2)
TCGA-55-8615-01	Inflammatory (Immune C3)
TCGA-HZ-A4BK-01	TGF-beta Dominant (Immune C6)
TCGA-EL-A3GQ-01	Inflammatory (Immune C3)
TCGA-BK-A26L-01	Wound Healing (Immune C1)
TCGA-VF-A8AA-01	IFN-gamma Dominant (Immune C2)
TCGA-G2-A2EO-01	Wound Healing (Immune C1)
TCGA-D6-A6EO-01	IFN-gamma Dominant (Immune C2)
TCGA-RC-A7SF-01	Inflammatory (Immune C3)
TCGA-EB-A24C-01	Lymphocyte Depleted (Immune C4)
TCGA-F1-A448-01	Wound Healing (Immune C1)
TCGA-A7-A0CJ-01	IFN-gamma Dominant (Immune C2)
TCGA-CS-6666-01	Lymphocyte Depleted (Immune C4)
TCGA-BP-4992-01	Inflammatory (Immune C3)
TCGA-CM-5868-01	Wound Healing (Immune C1)
TCGA-WC-A885-01	Lymphocyte Depleted (Immune C4)
TCGA-BR-A4IV-01	Inflammatory (Immune C3)
TCGA-HD-A4C1-01	IFN-gamma Dominant (Immune C2)
TCGA-P4-AAVO-01	Lymphocyte Depleted (Immune C4)
TCGA-NC-A5HK-01	IFN-gamma Dominant (Immune C2)
TCGA-VQ-A91Z-01	Wound Healing (Immune C1)
TCGA-DX-A8BR-01	Lymphocyte Depleted (Immune C4)
TCGA-W5-AA2X-01	Wound Healing (Immune C1)
TCGA-DH-A66D-01	Immunologically Quiet (Immune C5)
TCGA-IR-A3LH-01	IFN-gamma Dominant (Immune C2)
TCGA-KO-8410-01	Inflammatory (Immune C3)
TCGA-D1-A16R-01	Wound Healing (Immune C1)
TCGA-LN-A4A9-01	IFN-gamma Dominant (Immune C2)
TCGA-LL-A5YO-01	IFN-gamma Dominant (Immune C2)
TCGA-86-A4JF-01	IFN-gamma Dominant (Immune C2)
TCGA-DC-6156-01	TGF-beta Dominant (Immune C6)
TCGA-QU-A6IP-01	Inflammatory (Immune C3)
TCGA-FI-A3PV-01	Wound Healing (Immune C1)
TCGA-V1-A9O9-01	Inflammatory (Immune C3)
TCGA-EO-A2CG-01	Wound Healing (Immune C1)
TCGA-AN-A0FW-01	Wound Healing (Immune C1)
TCGA-VQ-A8PH-01	Wound Healing (Immune C1)
TCGA-AC-A6IX-01	Wound Healing (Immune C1)
TCGA-A5-A0GU-01	IFN-gamma Dominant (Immune C2)
TCGA-EB-A551-01	IFN-gamma Dominant (Immune C2)
TCGA-P5-A77W-01	Immunologically Quiet (Immune C5)
TCGA-HW-7491-01	Immunologically Quiet (Immune C5)
TCGA-EY-A1GS-01	Lymphocyte Depleted (Immune C4)
TCGA-AA-A010-01	Wound Healing (Immune C1)
TCGA-A3-3320-01	Inflammatory (Immune C3)
TCGA-FT-A3EE-01	Wound Healing (Immune C1)
TCGA-AA-3837-01	Wound Healing (Immune C1)
TCGA-L9-A443-01	Inflammatory (Immune C3)
TCGA-DJ-A2PN-01	Inflammatory (Immune C3)
TCGA-G3-A7M6-01	Inflammatory (Immune C3)
TCGA-E9-A1RG-01	Wound Healing (Immune C1)
TCGA-66-2767-01	IFN-gamma Dominant (Immune C2)
TCGA-MR-A520-01	Lymphocyte Depleted (Immune C4)
TCGA-FD-A3B7-01	IFN-gamma Dominant (Immune C2)
TCGA-E1-5307-01	Immunologically Quiet (Immune C5)
TCGA-78-8660-01	IFN-gamma Dominant (Immune C2)
TCGA-C5-A1M9-01	IFN-gamma Dominant (Immune C2)
TCGA-KL-8325-01	Immunologically Quiet (Immune C5)
TCGA-HW-7495-01	Immunologically Quiet (Immune C5)
TCGA-K4-A3WU-01	Inflammatory (Immune C3)
TCGA-AG-4021-01	Wound Healing (Immune C1)
TCGA-E2-A156-01	Inflammatory (Immune C3)
TCGA-CS-6669-01	Immunologically Quiet (Immune C5)
TCGA-EL-A3GW-01	Inflammatory (Immune C3)
TCGA-EM-A2CL-01	Inflammatory (Immune C3)
TCGA-CF-A47V-01	Lymphocyte Depleted (Immune C4)
TCGA-AR-A24R-01	IFN-gamma Dominant (Immune C2)
TCGA-BS-A0TE-01	IFN-gamma Dominant (Immune C2)
TCGA-HT-7481-01	Immunologically Quiet (Immune C5)
TCGA-BG-A0MU-01	Inflammatory (Immune C3)
TCGA-NC-A5HO-01	Wound Healing (Immune C1)
TCGA-EY-A1GD-01	Wound Healing (Immune C1)
TCGA-BF-A1PZ-01	IFN-gamma Dominant (Immune C2)
TCGA-XQ-A8TA-01	Lymphocyte Depleted (Immune C4)
TCGA-78-7148-01	Wound Healing (Immune C1)
TCGA-DU-8163-01	Immunologically Quiet (Immune C5)
TCGA-D8-A1JP-01	Wound Healing (Immune C1)
TCGA-T2-A6WZ-01	IFN-gamma Dominant (Immune C2)
TCGA-AP-A0LN-01	Wound Healing (Immune C1)
TCGA-AX-A06L-01	Wound Healing (Immune C1)
TCGA-AN-A0FS-01	Wound Healing (Immune C1)
TCGA-77-8154-01	Wound Healing (Immune C1)
TCGA-2G-AAFM-01	IFN-gamma Dominant (Immune C2)
TCGA-DJ-A3V5-01	Inflammatory (Immune C3)
TCGA-AC-A3TM-01	Wound Healing (Immune C1)
TCGA-DJ-A2Q3-01	Inflammatory (Immune C3)
TCGA-D6-8568-01	IFN-gamma Dominant (Immune C2)
TCGA-CV-7446-01	IFN-gamma Dominant (Immune C2)
TCGA-A5-A0GQ-01	IFN-gamma Dominant (Immune C2)
TCGA-DJ-A2PY-01	Inflammatory (Immune C3)
TCGA-DK-A3X1-01	Wound Healing (Immune C1)
TCGA-BG-A0MQ-01	Wound Healing (Immune C1)
TCGA-B9-A5W7-01	Inflammatory (Immune C3)
TCGA-C8-A12K-01	IFN-gamma Dominant (Immune C2)
TCGA-AR-A2LE-01	Inflammatory (Immune C3)
TCGA-AD-6964-01	IFN-gamma Dominant (Immune C2)
TCGA-37-A5EL-01	Wound Healing (Immune C1)
TCGA-26-1442-01	Immunologically Quiet (Immune C5)
TCGA-B0-4688-01	Lymphocyte Depleted (Immune C4)
TCGA-AA-3848-01	Wound Healing (Immune C1)
TCGA-BH-A0HK-01	Wound Healing (Immune C1)
TCGA-CJ-4899-01	Inflammatory (Immune C3)
TCGA-G4-6295-01	Wound Healing (Immune C1)
TCGA-RD-A8NB-01	IFN-gamma Dominant (Immune C2)
TCGA-B2-4101-01	Inflammatory (Immune C3)
TCGA-BQ-7048-01	Inflammatory (Immune C3)
TCGA-DG-A2KJ-01	IFN-gamma Dominant (Immune C2)
TCGA-55-A490-01	Wound Healing (Immune C1)
TCGA-4Z-AA81-01	IFN-gamma Dominant (Immune C2)
TCGA-D1-A16E-01	IFN-gamma Dominant (Immune C2)
TCGA-CF-A3MG-01	Wound Healing (Immune C1)
TCGA-QR-A708-01	Lymphocyte Depleted (Immune C4)
TCGA-CS-4942-01	Lymphocyte Depleted (Immune C4)
TCGA-BR-A4PE-01	IFN-gamma Dominant (Immune C2)
TCGA-NH-A50T-01	Wound Healing (Immune C1)
TCGA-FE-A237-01	Inflammatory (Immune C3)
TCGA-2G-AAFI-01	IFN-gamma Dominant (Immune C2)
TCGA-ZS-A9CE-01	Lymphocyte Depleted (Immune C4)
TCGA-AR-A250-01	Wound Healing (Immune C1)
TCGA-HC-7230-01	Inflammatory (Immune C3)
TCGA-S5-AA26-01	Wound Healing (Immune C1)
TCGA-HT-8110-01	Lymphocyte Depleted (Immune C4)
TCGA-D8-A1JG-01	IFN-gamma Dominant (Immune C2)
TCGA-KL-8337-01	Immunologically Quiet (Immune C5)
TCGA-ZF-A9R4-01	Lymphocyte Depleted (Immune C4)
TCGA-E2-A152-01	Wound Healing (Immune C1)
TCGA-GN-A26C-01	IFN-gamma Dominant (Immune C2)
TCGA-AR-A24V-01	IFN-gamma Dominant (Immune C2)
TCGA-85-8070-01	Wound Healing (Immune C1)
TCGA-BS-A0TA-01	IFN-gamma Dominant (Immune C2)
TCGA-A2-A0CR-01	TGF-beta Dominant (Immune C6)
TCGA-AK-3429-01	Inflammatory (Immune C3)
TCGA-PC-A5DL-01	TGF-beta Dominant (Immune C6)
TCGA-DX-A6BB-01	Lymphocyte Depleted (Immune C4)
TCGA-S9-A6U1-01	Immunologically Quiet (Immune C5)
TCGA-YC-A9TC-01	Wound Healing (Immune C1)
TCGA-BS-A0V4-01	Inflammatory (Immune C3)
TCGA-AN-A0FX-01	Wound Healing (Immune C1)
TCGA-Z6-A9VB-01	IFN-gamma Dominant (Immune C2)
TCGA-Q1-A5R3-01	IFN-gamma Dominant (Immune C2)
TCGA-AC-A62V-01	Wound Healing (Immune C1)
TCGA-CN-6988-01	Wound Healing (Immune C1)
TCGA-ET-A39O-01	Inflammatory (Immune C3)
TCGA-AP-A0LJ-01	Inflammatory (Immune C3)
TCGA-UB-AA0U-01	Inflammatory (Immune C3)
TCGA-A6-4107-01	Wound Healing (Immune C1)
TCGA-FK-A3S3-01	Inflammatory (Immune C3)
TCGA-FB-AAQ1-01	TGF-beta Dominant (Immune C6)
TCGA-AK-3455-01	IFN-gamma Dominant (Immune C2)
TCGA-HC-7211-01	Inflammatory (Immune C3)
TCGA-2Z-A9J3-01	Inflammatory (Immune C3)
TCGA-B2-3924-01	Inflammatory (Immune C3)
TCGA-GM-A3XN-01	Wound Healing (Immune C1)
TCGA-C8-A275-01	IFN-gamma Dominant (Immune C2)
TCGA-UD-AAC7-01	Wound Healing (Immune C1)
TCGA-4L-AA1F-01	Wound Healing (Immune C1)
TCGA-AK-3433-01	Inflammatory (Immune C3)
TCGA-DD-AAD8-01	Lymphocyte Depleted (Immune C4)
TCGA-AO-A129-01	IFN-gamma Dominant (Immune C2)
TCGA-P3-A6T3-01	IFN-gamma Dominant (Immune C2)
TCGA-R5-A7ZR-01	IFN-gamma Dominant (Immune C2)
TCGA-CV-A468-01	IFN-gamma Dominant (Immune C2)
TCGA-EJ-5516-01	Inflammatory (Immune C3)
TCGA-DX-A8BV-01	Lymphocyte Depleted (Immune C4)
TCGA-AO-A12E-01	Lymphocyte Depleted (Immune C4)
TCGA-VQ-A927-01	Wound Healing (Immune C1)
TCGA-YF-AA3L-01	Wound Healing (Immune C1)
TCGA-BP-4354-01	Lymphocyte Depleted (Immune C4)
TCGA-BR-8059-01	Wound Healing (Immune C1)
TCGA-EL-A3MZ-01	Inflammatory (Immune C3)
TCGA-BS-A0V8-01	Wound Healing (Immune C1)
TCGA-BH-A1F8-01	IFN-gamma Dominant (Immune C2)
TCGA-G3-AAV3-01	Inflammatory (Immune C3)
TCGA-QK-A6V9-01	IFN-gamma Dominant (Immune C2)
TCGA-A3-3306-01	Inflammatory (Immune C3)
TCGA-CC-A8HV-01	Lymphocyte Depleted (Immune C4)
TCGA-D8-A1JK-01	IFN-gamma Dominant (Immune C2)
TCGA-HC-A8D1-01	Inflammatory (Immune C3)
TCGA-ZF-A9R0-01	Wound Healing (Immune C1)
TCGA-RY-A840-01	Immunologically Quiet (Immune C5)
TCGA-A8-A08X-01	Wound Healing (Immune C1)
TCGA-EI-6882-01	Wound Healing (Immune C1)
TCGA-BP-4975-01	Inflammatory (Immune C3)
TCGA-AZ-4315-01	IFN-gamma Dominant (Immune C2)
TCGA-DD-AADO-01	IFN-gamma Dominant (Immune C2)
TCGA-3M-AB46-01	IFN-gamma Dominant (Immune C2)
TCGA-DX-A48R-01	Lymphocyte Depleted (Immune C4)
TCGA-VM-A8C9-01	Lymphocyte Depleted (Immune C4)
TCGA-EB-A85I-01	IFN-gamma Dominant (Immune C2)
TCGA-D6-A6EK-01	IFN-gamma Dominant (Immune C2)
TCGA-CJ-4869-01	Inflammatory (Immune C3)
TCGA-AA-3506-01	Wound Healing (Immune C1)
TCGA-3A-A9I9-01	Inflammatory (Immune C3)
TCGA-A4-8098-01	Lymphocyte Depleted (Immune C4)
TCGA-BR-4255-01	Wound Healing (Immune C1)
TCGA-F2-6879-01	IFN-gamma Dominant (Immune C2)
TCGA-IN-A7NT-01	IFN-gamma Dominant (Immune C2)
TCGA-29-1784-01	IFN-gamma Dominant (Immune C2)
TCGA-SR-A6MU-01	Lymphocyte Depleted (Immune C4)
TCGA-EB-A4OZ-01	IFN-gamma Dominant (Immune C2)
TCGA-J8-A3YD-01	Inflammatory (Immune C3)
TCGA-06-0743-01	Lymphocyte Depleted (Immune C4)
TCGA-D1-A16J-01	IFN-gamma Dominant (Immune C2)
TCGA-E9-A1R6-01	Wound Healing (Immune C1)
TCGA-R5-A7ZI-01	IFN-gamma Dominant (Immune C2)
TCGA-AJ-A3NC-01	Wound Healing (Immune C1)
TCGA-QR-A70K-01	Lymphocyte Depleted (Immune C4)
TCGA-G3-A25X-01	IFN-gamma Dominant (Immune C2)
TCGA-AP-A1DV-01	Wound Healing (Immune C1)
TCGA-BP-4983-01	IFN-gamma Dominant (Immune C2)
TCGA-B4-5378-01	Lymphocyte Depleted (Immune C4)
TCGA-BR-A4J6-01	Wound Healing (Immune C1)
TCGA-DQ-7591-01	IFN-gamma Dominant (Immune C2)
TCGA-A8-A09A-01	Inflammatory (Immune C3)
TCGA-G3-A3CK-01	Lymphocyte Depleted (Immune C4)
TCGA-BR-6801-01	Wound Healing (Immune C1)
TCGA-F9-A4JJ-01	Inflammatory (Immune C3)
TCGA-IQ-A61I-01	IFN-gamma Dominant (Immune C2)
TCGA-5P-A9JZ-01	Lymphocyte Depleted (Immune C4)
TCGA-HD-A6I0-01	IFN-gamma Dominant (Immune C2)
TCGA-WC-A87W-01	Inflammatory (Immune C3)
TCGA-EM-A3AR-01	Inflammatory (Immune C3)
TCGA-A4-A5Y0-01	Lymphocyte Depleted (Immune C4)
TCGA-57-1582-01	Wound Healing (Immune C1)
TCGA-HB-A3L4-01	Wound Healing (Immune C1)
TCGA-3A-A9IB-01	Wound Healing (Immune C1)
TCGA-G7-6792-01	Inflammatory (Immune C3)
TCGA-BD-A2L6-01	Lymphocyte Depleted (Immune C4)
TCGA-B2-5639-01	Inflammatory (Immune C3)
TCGA-GK-A6C7-01	Inflammatory (Immune C3)
TCGA-EL-A4K7-01	Inflammatory (Immune C3)
TCGA-ZG-A9LY-01	Inflammatory (Immune C3)
TCGA-DJ-A1QI-01	Inflammatory (Immune C3)
TCGA-B5-A1MW-01	IFN-gamma Dominant (Immune C2)
TCGA-DJ-A2PQ-01	Inflammatory (Immune C3)
TCGA-OR-A5KO-01	Lymphocyte Depleted (Immune C4)
TCGA-A8-A08O-01	Wound Healing (Immune C1)
TCGA-EM-A22M-01	Inflammatory (Immune C3)
TCGA-AA-A01C-01	Wound Healing (Immune C1)
TCGA-V4-A9ES-01	Lymphocyte Depleted (Immune C4)
TCGA-CV-7422-01	IFN-gamma Dominant (Immune C2)
TCGA-HT-7482-01	Immunologically Quiet (Immune C5)
TCGA-CV-6962-01	Wound Healing (Immune C1)
TCGA-EA-A50E-01	IFN-gamma Dominant (Immune C2)
TCGA-21-1082-01	Wound Healing (Immune C1)
TCGA-A2-A4RY-01	Inflammatory (Immune C3)
TCGA-QH-A6CW-01	Immunologically Quiet (Immune C5)
TCGA-UF-A7JT-01	IFN-gamma Dominant (Immune C2)
TCGA-HC-7737-01	Inflammatory (Immune C3)
TCGA-AL-3466-01	Inflammatory (Immune C3)
TCGA-R5-A805-01	IFN-gamma Dominant (Immune C2)
TCGA-A2-A0SY-01	Inflammatory (Immune C3)
TCGA-D1-A0ZQ-01	Wound Healing (Immune C1)
TCGA-AC-A8OP-01	Inflammatory (Immune C3)
TCGA-98-A53J-01	Wound Healing (Immune C1)
TCGA-VP-A87B-01	Inflammatory (Immune C3)
TCGA-DU-A7T8-01	Lymphocyte Depleted (Immune C4)
TCGA-AO-A126-01	Wound Healing (Immune C1)
TCGA-EM-A4FF-01	Inflammatory (Immune C3)
TCGA-CJ-4878-01	Inflammatory (Immune C3)
TCGA-CH-5792-01	Inflammatory (Immune C3)
TCGA-DD-A11D-01	Lymphocyte Depleted (Immune C4)
TCGA-AO-A0J6-01	IFN-gamma Dominant (Immune C2)
TCGA-DU-5870-01	Immunologically Quiet (Immune C5)
TCGA-24-2033-01	Lymphocyte Depleted (Immune C4)
TCGA-D5-5539-01	Wound Healing (Immune C1)
TCGA-DD-AACK-01	Lymphocyte Depleted (Immune C4)
TCGA-D8-A27F-01	Wound Healing (Immune C1)
TCGA-AP-A1DR-01	Wound Healing (Immune C1)
TCGA-56-7579-01	Lymphocyte Depleted (Immune C4)
TCGA-EA-A556-01	IFN-gamma Dominant (Immune C2)
TCGA-MJ-A68J-01	Inflammatory (Immune C3)
TCGA-DD-A118-01	Inflammatory (Immune C3)
TCGA-VS-A9V3-01	IFN-gamma Dominant (Immune C2)
TCGA-44-6774-01	Wound Healing (Immune C1)
TCGA-KD-A5QS-01	Lymphocyte Depleted (Immune C4)
TCGA-BQ-7061-01	Inflammatory (Immune C3)
TCGA-A5-A3LP-01	Wound Healing (Immune C1)
TCGA-25-1627-01	Wound Healing (Immune C1)
TCGA-63-A5MJ-01	IFN-gamma Dominant (Immune C2)
TCGA-EW-A2FV-01	IFN-gamma Dominant (Immune C2)
TCGA-V4-A9E8-01	Inflammatory (Immune C3)
TCGA-TP-A8TV-01	Inflammatory (Immune C3)
TCGA-AY-6386-01	Wound Healing (Immune C1)
TCGA-D7-A74A-01	Wound Healing (Immune C1)
TCGA-TM-A84S-01	Immunologically Quiet (Immune C5)
TCGA-B0-4701-01	Inflammatory (Immune C3)
TCGA-33-4538-01	Wound Healing (Immune C1)
TCGA-26-5136-01	Lymphocyte Depleted (Immune C4)
TCGA-GU-A42P-01	Wound Healing (Immune C1)
TCGA-B0-4698-01	IFN-gamma Dominant (Immune C2)
TCGA-CS-4943-01	Lymphocyte Depleted (Immune C4)
TCGA-G7-6796-01	Inflammatory (Immune C3)
TCGA-AA-3855-01	Wound Healing (Immune C1)
TCGA-E9-A54X-01	Lymphocyte Depleted (Immune C4)
TCGA-AX-A2HJ-01	Wound Healing (Immune C1)
TCGA-AO-A0JB-01	Wound Healing (Immune C1)
TCGA-2F-A9KP-01	Wound Healing (Immune C1)
TCGA-A2-A1G1-01	IFN-gamma Dominant (Immune C2)
TCGA-AC-A3W5-01	Wound Healing (Immune C1)
TCGA-A6-5661-01	Wound Healing (Immune C1)
TCGA-DJ-A1QF-01	Inflammatory (Immune C3)
TCGA-N8-A4PO-01	Wound Healing (Immune C1)
TCGA-KL-8338-01	Inflammatory (Immune C3)
TCGA-LN-A4A2-01	Wound Healing (Immune C1)
TCGA-J4-A83N-01	Inflammatory (Immune C3)
TCGA-WB-A80K-01	Inflammatory (Immune C3)
TCGA-CA-5797-01	Wound Healing (Immune C1)
TCGA-B5-A11M-01	Inflammatory (Immune C3)
TCGA-A7-A13G-01	Inflammatory (Immune C3)
TCGA-AA-3514-01	Wound Healing (Immune C1)
TCGA-V4-A9EW-01	Inflammatory (Immune C3)
TCGA-2G-AALY-01	Wound Healing (Immune C1)
TCGA-14-1034-01	Lymphocyte Depleted (Immune C4)
TCGA-E2-A1IH-01	Wound Healing (Immune C1)
TCGA-BR-A4IU-01	Inflammatory (Immune C3)
TCGA-VS-A9UH-01	IFN-gamma Dominant (Immune C2)
TCGA-B0-4691-01	IFN-gamma Dominant (Immune C2)
TCGA-CN-A6V3-01	IFN-gamma Dominant (Immune C2)
TCGA-G3-AAV7-01	Lymphocyte Depleted (Immune C4)
TCGA-CU-A3QU-01	Lymphocyte Depleted (Immune C4)
TCGA-D1-A17U-01	Wound Healing (Immune C1)
TCGA-BG-A0VW-01	Wound Healing (Immune C1)
TCGA-AC-A3EH-01	Wound Healing (Immune C1)
TCGA-12-3652-01	Lymphocyte Depleted (Immune C4)
TCGA-A3-A6NN-01	Inflammatory (Immune C3)
TCGA-D8-A1Y1-01	Lymphocyte Depleted (Immune C4)
TCGA-UD-AAC1-01	Wound Healing (Immune C1)
TCGA-BR-8677-01	IFN-gamma Dominant (Immune C2)
TCGA-AO-A03V-01	Wound Healing (Immune C1)
TCGA-RY-A845-01	Immunologically Quiet (Immune C5)
TCGA-CJ-5689-01	Inflammatory (Immune C3)
TCGA-DK-AA6Q-01	IFN-gamma Dominant (Immune C2)
TCGA-DD-A4NI-01	Inflammatory (Immune C3)
TCGA-EY-A1GP-01	IFN-gamma Dominant (Immune C2)
TCGA-EJ-5515-01	Inflammatory (Immune C3)
TCGA-76-4927-01	Lymphocyte Depleted (Immune C4)
TCGA-FG-8182-01	Immunologically Quiet (Immune C5)
TCGA-UF-A7JC-01	IFN-gamma Dominant (Immune C2)
TCGA-CN-5373-01	IFN-gamma Dominant (Immune C2)
TCGA-E3-A3DZ-01	Inflammatory (Immune C3)
TCGA-26-5132-01	Lymphocyte Depleted (Immune C4)
TCGA-A3-3363-01	Lymphocyte Depleted (Immune C4)
TCGA-BH-A0DD-01	IFN-gamma Dominant (Immune C2)
TCGA-X6-A8C4-01	Lymphocyte Depleted (Immune C4)
TCGA-VS-A9UD-01	IFN-gamma Dominant (Immune C2)
TCGA-JX-A3PZ-01	Wound Healing (Immune C1)
TCGA-BP-4325-01	Inflammatory (Immune C3)
TCGA-DD-AADL-01	Lymphocyte Depleted (Immune C4)
TCGA-BT-A20P-01	Wound Healing (Immune C1)
TCGA-FB-AAPZ-01	Inflammatory (Immune C3)
TCGA-98-A53A-01	Wound Healing (Immune C1)
TCGA-EU-5905-01	Inflammatory (Immune C3)
TCGA-CZ-5985-01	Inflammatory (Immune C3)
TCGA-N9-A4Q4-01	Wound Healing (Immune C1)
TCGA-WR-A838-01	IFN-gamma Dominant (Immune C2)
TCGA-B5-A11I-01	IFN-gamma Dominant (Immune C2)
TCGA-V1-A8WV-01	Inflammatory (Immune C3)
TCGA-D7-6525-01	IFN-gamma Dominant (Immune C2)
TCGA-91-8497-01	Inflammatory (Immune C3)
TCGA-A5-A7WJ-01	IFN-gamma Dominant (Immune C2)
TCGA-ZF-A9RN-01	IFN-gamma Dominant (Immune C2)
TCGA-NC-A5HL-01	IFN-gamma Dominant (Immune C2)
TCGA-L3-A524-01	Wound Healing (Immune C1)
TCGA-C5-A1MP-01	IFN-gamma Dominant (Immune C2)
TCGA-BR-A4J1-01	Wound Healing (Immune C1)
TCGA-CC-A5UD-01	Lymphocyte Depleted (Immune C4)
TCGA-IN-A6RO-01	IFN-gamma Dominant (Immune C2)
TCGA-B7-A5TK-01	IFN-gamma Dominant (Immune C2)
TCGA-E6-A2P8-01	Wound Healing (Immune C1)
TCGA-AJ-A23O-01	IFN-gamma Dominant (Immune C2)
TCGA-X6-A7WD-01	Lymphocyte Depleted (Immune C4)
TCGA-56-8307-01	IFN-gamma Dominant (Immune C2)
TCGA-A2-A0EN-01	Inflammatory (Immune C3)
TCGA-GV-A3QI-01	Lymphocyte Depleted (Immune C4)
TCGA-W5-AA2H-01	IFN-gamma Dominant (Immune C2)
TCGA-DX-A6YX-01	Lymphocyte Depleted (Immune C4)
TCGA-3X-AAVB-01	Wound Healing (Immune C1)
TCGA-FB-AAPU-01	Wound Healing (Immune C1)
TCGA-VQ-A8PO-01	IFN-gamma Dominant (Immune C2)
TCGA-DD-AAE6-01	Lymphocyte Depleted (Immune C4)
TCGA-J1-A4AH-01	Wound Healing (Immune C1)
TCGA-GU-A42R-01	Wound Healing (Immune C1)
TCGA-B0-5081-01	Inflammatory (Immune C3)
TCGA-33-AASL-01	IFN-gamma Dominant (Immune C2)
TCGA-CW-5587-01	Inflammatory (Immune C3)
TCGA-CG-4301-01	IFN-gamma Dominant (Immune C2)
TCGA-BA-5149-01	IFN-gamma Dominant (Immune C2)
TCGA-FG-6688-01	Lymphocyte Depleted (Immune C4)
TCGA-H9-7775-01	Inflammatory (Immune C3)
TCGA-E9-A1R2-01	IFN-gamma Dominant (Immune C2)
TCGA-62-A470-01	Lymphocyte Depleted (Immune C4)
TCGA-A8-A08L-01	Wound Healing (Immune C1)
TCGA-A7-A3RF-01	Lymphocyte Depleted (Immune C4)
TCGA-53-A4EZ-01	IFN-gamma Dominant (Immune C2)
TCGA-78-7162-01	Inflammatory (Immune C3)
TCGA-IG-A51D-01	IFN-gamma Dominant (Immune C2)
TCGA-FD-A5BU-01	IFN-gamma Dominant (Immune C2)
TCGA-68-8251-01	Wound Healing (Immune C1)
TCGA-BG-A2AD-01	Wound Healing (Immune C1)
TCGA-B0-4847-01	Inflammatory (Immune C3)
TCGA-RS-A6TO-01	IFN-gamma Dominant (Immune C2)
TCGA-MQ-A4LC-01	IFN-gamma Dominant (Immune C2)
TCGA-F4-6808-01	Wound Healing (Immune C1)
TCGA-76-4932-01	Lymphocyte Depleted (Immune C4)
TCGA-A2-A0D4-01	Wound Healing (Immune C1)
TCGA-DI-A1NN-01	IFN-gamma Dominant (Immune C2)
TCGA-HT-7689-01	Immunologically Quiet (Immune C5)
TCGA-EW-A1IW-01	Wound Healing (Immune C1)
TCGA-VQ-A94P-01	Inflammatory (Immune C3)
TCGA-CV-6003-01	IFN-gamma Dominant (Immune C2)
TCGA-AG-3909-01	Wound Healing (Immune C1)
TCGA-21-1081-01	Wound Healing (Immune C1)
TCGA-AO-A03M-01	IFN-gamma Dominant (Immune C2)
TCGA-D7-6521-01	Wound Healing (Immune C1)
TCGA-58-8391-01	Wound Healing (Immune C1)
TCGA-HF-A5NB-01	IFN-gamma Dominant (Immune C2)
TCGA-B6-A0IQ-01	Wound Healing (Immune C1)
TCGA-62-8398-01	Wound Healing (Immune C1)
TCGA-BH-A1FG-01	IFN-gamma Dominant (Immune C2)
TCGA-AR-A0TS-01	IFN-gamma Dominant (Immune C2)
TCGA-66-2754-01	Wound Healing (Immune C1)
TCGA-CJ-5686-01	Inflammatory (Immune C3)
TCGA-A2-A0CM-01	IFN-gamma Dominant (Immune C2)
TCGA-FD-A3NA-01	IFN-gamma Dominant (Immune C2)
TCGA-85-A4QQ-01	Wound Healing (Immune C1)
TCGA-E2-A15I-01	Inflammatory (Immune C3)
TCGA-A8-A06X-01	IFN-gamma Dominant (Immune C2)
TCGA-KF-A41W-01	Wound Healing (Immune C1)
TCGA-FG-7638-01	Immunologically Quiet (Immune C5)
TCGA-IB-AAUN-01	Wound Healing (Immune C1)
TCGA-UD-AAC4-01	Wound Healing (Immune C1)
TCGA-KB-A93J-01	IFN-gamma Dominant (Immune C2)
TCGA-49-AAR4-01	IFN-gamma Dominant (Immune C2)
TCGA-29-1763-01	IFN-gamma Dominant (Immune C2)
TCGA-22-4601-01	Wound Healing (Immune C1)
TCGA-DU-7013-01	Lymphocyte Depleted (Immune C4)
TCGA-ET-A40Q-01	Inflammatory (Immune C3)
TCGA-EB-A3Y6-01	Wound Healing (Immune C1)
TCGA-63-A5MB-01	Wound Healing (Immune C1)
TCGA-VN-A88Q-01	Inflammatory (Immune C3)
TCGA-OR-A5JP-01	Lymphocyte Depleted (Immune C4)
TCGA-QF-A5YT-01	Wound Healing (Immune C1)
TCGA-BP-5001-01	Inflammatory (Immune C3)
TCGA-A6-5662-01	Wound Healing (Immune C1)
TCGA-G9-6348-01	Wound Healing (Immune C1)
TCGA-32-1970-01	Lymphocyte Depleted (Immune C4)
TCGA-61-2111-01	IFN-gamma Dominant (Immune C2)
TCGA-BP-4968-01	Inflammatory (Immune C3)
TCGA-DK-AA76-01	Lymphocyte Depleted (Immune C4)
TCGA-DJ-A3V4-01	Inflammatory (Immune C3)
TCGA-L5-A4OO-01	IFN-gamma Dominant (Immune C2)
TCGA-2A-A8VL-01	Inflammatory (Immune C3)
TCGA-V1-A9ZK-01	Inflammatory (Immune C3)
TCGA-43-5670-01	IFN-gamma Dominant (Immune C2)
TCGA-B0-4838-01	Inflammatory (Immune C3)
TCGA-62-A46Y-01	IFN-gamma Dominant (Immune C2)
TCGA-AA-3489-01	Wound Healing (Immune C1)
TCGA-MU-A5YI-01	IFN-gamma Dominant (Immune C2)
TCGA-BQ-5882-01	Inflammatory (Immune C3)
TCGA-66-2758-01	IFN-gamma Dominant (Immune C2)
TCGA-DK-A1AA-01	Wound Healing (Immune C1)
TCGA-DJ-A4UQ-01	Inflammatory (Immune C3)
TCGA-CH-5765-01	Inflammatory (Immune C3)
TCGA-A2-A0CZ-01	Inflammatory (Immune C3)
TCGA-B3-3926-01	Inflammatory (Immune C3)
TCGA-AF-2687-01	Wound Healing (Immune C1)
TCGA-E1-A7Z3-01	Immunologically Quiet (Immune C5)
TCGA-VS-A8QA-01	IFN-gamma Dominant (Immune C2)
TCGA-DD-AAD3-01	Inflammatory (Immune C3)
TCGA-AN-A0XS-01	Inflammatory (Immune C3)
TCGA-G9-6377-01	Wound Healing (Immune C1)
TCGA-DD-A39V-01	IFN-gamma Dominant (Immune C2)
TCGA-AG-A016-01	Wound Healing (Immune C1)
TCGA-EJ-5511-01	Inflammatory (Immune C3)
TCGA-A2-A04Q-01	IFN-gamma Dominant (Immune C2)
TCGA-WA-A7GZ-01	IFN-gamma Dominant (Immune C2)
TCGA-HT-7476-01	Lymphocyte Depleted (Immune C4)
TCGA-AZ-6599-01	Lymphocyte Depleted (Immune C4)
TCGA-BR-8381-01	IFN-gamma Dominant (Immune C2)
TCGA-K1-A3PN-01	Wound Healing (Immune C1)
TCGA-ED-A97K-01	Inflammatory (Immune C3)
TCGA-2G-AAGV-01	Wound Healing (Immune C1)
TCGA-CH-5788-01	Lymphocyte Depleted (Immune C4)
TCGA-HZ-A9TJ-01	Wound Healing (Immune C1)
TCGA-TQ-A7RG-01	Immunologically Quiet (Immune C5)
TCGA-D1-A15X-01	IFN-gamma Dominant (Immune C2)
TCGA-94-7557-01	Wound Healing (Immune C1)
TCGA-CN-5374-01	IFN-gamma Dominant (Immune C2)
TCGA-G4-6299-01	IFN-gamma Dominant (Immune C2)
TCGA-98-7454-01	IFN-gamma Dominant (Immune C2)
TCGA-DM-A1D8-01	Wound Healing (Immune C1)
TCGA-E2-A109-01	IFN-gamma Dominant (Immune C2)
TCGA-G9-6336-01	Inflammatory (Immune C3)
TCGA-V1-A8MG-01	Inflammatory (Immune C3)
TCGA-AC-A5XS-01	IFN-gamma Dominant (Immune C2)
TCGA-FD-A6TF-01	Wound Healing (Immune C1)
TCGA-AX-A064-01	Wound Healing (Immune C1)
TCGA-FG-8181-01	Immunologically Quiet (Immune C5)
TCGA-13-1410-01	IFN-gamma Dominant (Immune C2)
TCGA-B6-A1KF-01	Wound Healing (Immune C1)
TCGA-BT-A20W-01	Wound Healing (Immune C1)
TCGA-BH-A1FL-01	Inflammatory (Immune C3)
TCGA-IQ-A6SG-01	Wound Healing (Immune C1)
TCGA-B2-A4SR-01	Inflammatory (Immune C3)
TCGA-E9-A1NI-01	IFN-gamma Dominant (Immune C2)
TCGA-33-A5GW-01	Wound Healing (Immune C1)
TCGA-A5-A0R8-01	IFN-gamma Dominant (Immune C2)
TCGA-EM-A1YA-01	Inflammatory (Immune C3)
TCGA-DU-A7T6-01	Lymphocyte Depleted (Immune C4)
TCGA-YU-A90S-01	IFN-gamma Dominant (Immune C2)
TCGA-BC-A69H-01	Lymphocyte Depleted (Immune C4)
TCGA-24-1553-01	IFN-gamma Dominant (Immune C2)
TCGA-DB-A4XC-01	Immunologically Quiet (Immune C5)
TCGA-XE-AAOD-01	IFN-gamma Dominant (Immune C2)
TCGA-A8-A07R-01	IFN-gamma Dominant (Immune C2)
TCGA-62-A46R-01	IFN-gamma Dominant (Immune C2)
TCGA-CJ-4903-01	Inflammatory (Immune C3)
TCGA-EP-A2KA-01	IFN-gamma Dominant (Immune C2)
TCGA-AN-A03Y-01	Wound Healing (Immune C1)
TCGA-A2-A0T7-01	Wound Healing (Immune C1)
TCGA-B5-A3FA-01	IFN-gamma Dominant (Immune C2)
TCGA-EL-A3CL-01	Inflammatory (Immune C3)
TCGA-A2-A0CV-01	Inflammatory (Immune C3)
TCGA-63-A5MV-01	Wound Healing (Immune C1)
TCGA-DX-AB2E-01	Wound Healing (Immune C1)
TCGA-GU-A767-01	IFN-gamma Dominant (Immune C2)
TCGA-DD-AAE2-01	Inflammatory (Immune C3)
TCGA-FG-A4MW-01	Lymphocyte Depleted (Immune C4)
TCGA-BR-6456-01	IFN-gamma Dominant (Immune C2)
TCGA-CC-A5UC-01	Wound Healing (Immune C1)
TCGA-B1-A657-01	Inflammatory (Immune C3)
TCGA-BH-A1FH-01	Wound Healing (Immune C1)
TCGA-F9-A8NY-01	Inflammatory (Immune C3)
TCGA-29-1710-01	IFN-gamma Dominant (Immune C2)
TCGA-W2-A7HD-01	Lymphocyte Depleted (Immune C4)
TCGA-55-6712-01	Inflammatory (Immune C3)
TCGA-2G-AAH2-01	IFN-gamma Dominant (Immune C2)
TCGA-BP-5189-01	Inflammatory (Immune C3)
TCGA-HT-7467-01	Immunologically Quiet (Immune C5)
TCGA-CN-4731-01	IFN-gamma Dominant (Immune C2)
TCGA-D7-A6EV-01	Wound Healing (Immune C1)
TCGA-HC-7818-01	Inflammatory (Immune C3)
TCGA-L5-A8NT-01	Wound Healing (Immune C1)
TCGA-C5-A2M2-01	Lymphocyte Depleted (Immune C4)
TCGA-CJ-4881-01	Inflammatory (Immune C3)
TCGA-3X-AAVA-01	Inflammatory (Immune C3)
TCGA-QR-A70C-01	Inflammatory (Immune C3)
TCGA-IG-A3YA-01	Wound Healing (Immune C1)
TCGA-HZ-A49H-01	Inflammatory (Immune C3)
TCGA-KR-A7K8-01	Inflammatory (Immune C3)
TCGA-EJ-5497-01	Inflammatory (Immune C3)
TCGA-AN-A0XN-01	TGF-beta Dominant (Immune C6)
TCGA-A1-A0SK-01	Wound Healing (Immune C1)
TCGA-BP-4807-01	Inflammatory (Immune C3)
TCGA-AO-A125-01	Inflammatory (Immune C3)
TCGA-XF-A9T5-01	IFN-gamma Dominant (Immune C2)
TCGA-B8-A54G-01	Inflammatory (Immune C3)
TCGA-06-0219-01	Lymphocyte Depleted (Immune C4)
TCGA-PE-A5DC-01	IFN-gamma Dominant (Immune C2)
TCGA-AD-5900-01	IFN-gamma Dominant (Immune C2)
TCGA-EO-A1Y5-01	IFN-gamma Dominant (Immune C2)
TCGA-DH-5142-01	Immunologically Quiet (Immune C5)
TCGA-05-4244-01	Lymphocyte Depleted (Immune C4)
TCGA-AX-A060-01	Wound Healing (Immune C1)
TCGA-XF-A8HE-01	IFN-gamma Dominant (Immune C2)
TCGA-BH-A0AU-01	IFN-gamma Dominant (Immune C2)
TCGA-AK-3450-01	Inflammatory (Immune C3)
TCGA-14-0787-01	Lymphocyte Depleted (Immune C4)
TCGA-E3-A3E0-01	Inflammatory (Immune C3)
TCGA-AF-3400-01	Lymphocyte Depleted (Immune C4)
TCGA-BQ-5890-01	Lymphocyte Depleted (Immune C4)
TCGA-S9-A6U2-01	Immunologically Quiet (Immune C5)
TCGA-L5-A8NW-01	IFN-gamma Dominant (Immune C2)
TCGA-IA-A83T-01	Inflammatory (Immune C3)
TCGA-DX-A1KU-01	TGF-beta Dominant (Immune C6)
TCGA-GC-A3RB-01	IFN-gamma Dominant (Immune C2)
TCGA-S6-A8JW-01	IFN-gamma Dominant (Immune C2)
TCGA-CC-A7IE-01	IFN-gamma Dominant (Immune C2)
TCGA-SU-A7E7-01	Inflammatory (Immune C3)
TCGA-12-0618-01	Lymphocyte Depleted (Immune C4)
TCGA-BJ-A28X-01	Inflammatory (Immune C3)
TCGA-L9-A8F4-01	IFN-gamma Dominant (Immune C2)
TCGA-G7-6795-01	Inflammatory (Immune C3)
TCGA-H5-A2HR-01	IFN-gamma Dominant (Immune C2)
TCGA-B0-4811-01	Inflammatory (Immune C3)
TCGA-27-2524-01	Lymphocyte Depleted (Immune C4)
TCGA-GM-A2DB-01	IFN-gamma Dominant (Immune C2)
TCGA-EC-A1NJ-01	IFN-gamma Dominant (Immune C2)
TCGA-VN-A88N-01	Inflammatory (Immune C3)
TCGA-RD-A8N0-01	IFN-gamma Dominant (Immune C2)
TCGA-TQ-A7RH-01	Immunologically Quiet (Immune C5)
TCGA-L5-A4OI-01	Lymphocyte Depleted (Immune C4)
TCGA-B8-5550-01	Inflammatory (Immune C3)
TCGA-N8-A4PL-01	Wound Healing (Immune C1)
TCGA-4R-AA8I-01	Lymphocyte Depleted (Immune C4)
TCGA-VF-A8A8-01	Wound Healing (Immune C1)
TCGA-E9-A244-01	Wound Healing (Immune C1)
TCGA-CG-4442-01	Wound Healing (Immune C1)
TCGA-S7-A7X0-01	Inflammatory (Immune C3)
TCGA-DQ-7593-01	IFN-gamma Dominant (Immune C2)
TCGA-A8-A0AB-01	Wound Healing (Immune C1)
TCGA-55-7726-01	Wound Healing (Immune C1)
TCGA-2E-A9G8-01	IFN-gamma Dominant (Immune C2)
TCGA-A2-A3XV-01	Wound Healing (Immune C1)
TCGA-KV-A74V-01	Inflammatory (Immune C3)
TCGA-A6-5666-01	Wound Healing (Immune C1)
TCGA-08-0386-01	Lymphocyte Depleted (Immune C4)
TCGA-BP-5194-01	Inflammatory (Immune C3)
TCGA-CN-4735-01	IFN-gamma Dominant (Immune C2)
TCGA-91-6849-01	Inflammatory (Immune C3)
TCGA-G9-6356-01	Inflammatory (Immune C3)
TCGA-49-4512-01	TGF-beta Dominant (Immune C6)
TCGA-OR-A5JO-01	Inflammatory (Immune C3)
TCGA-FU-A5XV-01	IFN-gamma Dominant (Immune C2)
TCGA-QR-A70U-01	Lymphocyte Depleted (Immune C4)
TCGA-DB-A75M-01	Immunologically Quiet (Immune C5)
TCGA-DM-A1D7-01	Wound Healing (Immune C1)
TCGA-AN-A04A-01	Wound Healing (Immune C1)
TCGA-HT-8012-01	Immunologically Quiet (Immune C5)
TCGA-AA-A022-01	IFN-gamma Dominant (Immune C2)
TCGA-EX-A8YF-01	IFN-gamma Dominant (Immune C2)
TCGA-EM-A22P-01	Inflammatory (Immune C3)
TCGA-TS-A7OU-01	Lymphocyte Depleted (Immune C4)
TCGA-E2-A14O-01	Wound Healing (Immune C1)
TCGA-A7-A0D9-01	Wound Healing (Immune C1)
TCGA-S9-A7QW-01	Immunologically Quiet (Immune C5)
TCGA-BF-AAOX-01	Wound Healing (Immune C1)
TCGA-P5-A733-01	Immunologically Quiet (Immune C5)
TCGA-66-2770-01	Wound Healing (Immune C1)
TCGA-ED-A7PX-01	Wound Healing (Immune C1)
TCGA-2J-AABK-01	IFN-gamma Dominant (Immune C2)
TCGA-EM-A2CK-01	Inflammatory (Immune C3)
TCGA-2Z-A9JO-01	Lymphocyte Depleted (Immune C4)
TCGA-24-1567-01	Wound Healing (Immune C1)
TCGA-B8-4154-01	Inflammatory (Immune C3)
TCGA-AO-A0JJ-01	TGF-beta Dominant (Immune C6)
TCGA-AA-A02Y-01	Wound Healing (Immune C1)
TCGA-CJ-4890-01	Inflammatory (Immune C3)
TCGA-DX-A240-01	Wound Healing (Immune C1)
TCGA-MX-A666-01	Wound Healing (Immune C1)
TCGA-3A-A9J0-01	Wound Healing (Immune C1)
TCGA-34-5241-01	IFN-gamma Dominant (Immune C2)
TCGA-E1-A7Z4-01	Immunologically Quiet (Immune C5)
TCGA-DU-A5TR-01	Lymphocyte Depleted (Immune C4)
TCGA-75-6203-01	Inflammatory (Immune C3)
TCGA-77-8133-01	IFN-gamma Dominant (Immune C2)
TCGA-28-5204-01	Lymphocyte Depleted (Immune C4)
TCGA-EL-A3H1-01	Inflammatory (Immune C3)
TCGA-36-1577-01	Wound Healing (Immune C1)
TCGA-AG-3887-01	Wound Healing (Immune C1)
TCGA-ZH-A8Y4-01	Lymphocyte Depleted (Immune C4)
TCGA-43-6647-01	Wound Healing (Immune C1)
TCGA-CD-5800-01	IFN-gamma Dominant (Immune C2)
TCGA-SW-A7EA-01	IFN-gamma Dominant (Immune C2)
TCGA-GL-A9DC-01	Inflammatory (Immune C3)
TCGA-ZJ-A8QR-01	IFN-gamma Dominant (Immune C2)
TCGA-V7-A7HQ-01	Wound Healing (Immune C1)
TCGA-AN-A046-01	IFN-gamma Dominant (Immune C2)
TCGA-09-0367-01	Lymphocyte Depleted (Immune C4)
TCGA-FG-8185-01	Immunologically Quiet (Immune C5)
TCGA-BK-A4ZD-01	Lymphocyte Depleted (Immune C4)
TCGA-N5-A4R8-01	Wound Healing (Immune C1)
TCGA-VR-A8ER-01	Wound Healing (Immune C1)
TCGA-FX-A8OO-01	Wound Healing (Immune C1)
TCGA-KS-A41F-01	Inflammatory (Immune C3)
TCGA-XF-AAME-01	Wound Healing (Immune C1)
TCGA-KO-8411-01	Immunologically Quiet (Immune C5)
TCGA-OR-A5JX-01	Inflammatory (Immune C3)
TCGA-73-A9RS-01	Wound Healing (Immune C1)
TCGA-CJ-4893-01	Inflammatory (Immune C3)
TCGA-A3-3329-01	Inflammatory (Immune C3)
TCGA-HW-8320-01	Immunologically Quiet (Immune C5)
TCGA-HZ-A77P-01	Inflammatory (Immune C3)
TCGA-MP-A4TD-01	Inflammatory (Immune C3)
TCGA-EW-A3U0-01	IFN-gamma Dominant (Immune C2)
TCGA-A6-2683-01	Lymphocyte Depleted (Immune C4)
TCGA-EL-A3H5-01	Inflammatory (Immune C3)
TCGA-IA-A40Y-01	Lymphocyte Depleted (Immune C4)
TCGA-FD-A6TE-01	Wound Healing (Immune C1)
TCGA-2A-A8VV-01	Wound Healing (Immune C1)
TCGA-R6-A8W5-01	Wound Healing (Immune C1)
TCGA-UZ-A9PP-01	Inflammatory (Immune C3)
TCGA-L7-A56G-01	Wound Healing (Immune C1)
TCGA-Y8-A898-01	Lymphocyte Depleted (Immune C4)
TCGA-DF-A2KY-01	IFN-gamma Dominant (Immune C2)
TCGA-RW-A67W-01	Lymphocyte Depleted (Immune C4)
TCGA-NJ-A4YG-01	Inflammatory (Immune C3)
TCGA-AO-A0JF-01	Inflammatory (Immune C3)
TCGA-A2-A0T0-01	Wound Healing (Immune C1)
TCGA-BH-A0EA-01	Inflammatory (Immune C3)
TCGA-BT-A20O-01	IFN-gamma Dominant (Immune C2)
TCGA-CS-6667-01	Immunologically Quiet (Immune C5)
TCGA-75-5147-01	IFN-gamma Dominant (Immune C2)
TCGA-KV-A6GE-01	Inflammatory (Immune C3)
TCGA-E2-A572-01	Lymphocyte Depleted (Immune C4)
TCGA-DU-5849-01	Immunologically Quiet (Immune C5)
TCGA-56-7731-01	Wound Healing (Immune C1)
TCGA-61-1740-01	IFN-gamma Dominant (Immune C2)
TCGA-63-A5MN-01	TGF-beta Dominant (Immune C6)
TCGA-DB-5279-01	Immunologically Quiet (Immune C5)
TCGA-D8-A147-01	IFN-gamma Dominant (Immune C2)
TCGA-44-7671-01	Inflammatory (Immune C3)
TCGA-F6-A8O3-01	Immunologically Quiet (Immune C5)
TCGA-LL-A5YN-01	IFN-gamma Dominant (Immune C2)
TCGA-MI-A75C-01	Lymphocyte Depleted (Immune C4)
TCGA-AK-3458-01	IFN-gamma Dominant (Immune C2)
TCGA-NA-A4QV-01	Wound Healing (Immune C1)
TCGA-V5-A7RB-01	IFN-gamma Dominant (Immune C2)
TCGA-DQ-5630-01	IFN-gamma Dominant (Immune C2)
TCGA-06-0190-01	Lymphocyte Depleted (Immune C4)
TCGA-E2-A1LE-01	Wound Healing (Immune C1)
TCGA-38-4631-01	IFN-gamma Dominant (Immune C2)
TCGA-A3-3358-01	Inflammatory (Immune C3)
TCGA-CM-6676-01	Wound Healing (Immune C1)
TCGA-L5-A8NS-01	Wound Healing (Immune C1)
TCGA-CJ-4882-01	Inflammatory (Immune C3)
TCGA-IR-A3LB-01	IFN-gamma Dominant (Immune C2)
TCGA-F1-6177-01	IFN-gamma Dominant (Immune C2)
TCGA-EY-A4KR-01	IFN-gamma Dominant (Immune C2)
TCGA-AG-3878-01	Inflammatory (Immune C3)
TCGA-IB-AAUQ-01	IFN-gamma Dominant (Immune C2)
TCGA-HC-A9TH-01	IFN-gamma Dominant (Immune C2)
TCGA-C8-A26Y-01	Wound Healing (Immune C1)
TCGA-MZ-A7D7-01	IFN-gamma Dominant (Immune C2)
TCGA-D7-8570-01	IFN-gamma Dominant (Immune C2)
TCGA-CV-A6JT-01	IFN-gamma Dominant (Immune C2)
TCGA-B0-4833-01	Inflammatory (Immune C3)
TCGA-NC-A5HF-01	Wound Healing (Immune C1)
TCGA-G4-6626-01	Wound Healing (Immune C1)
TCGA-SR-A6MS-01	Lymphocyte Depleted (Immune C4)
TCGA-A8-A08H-01	TGF-beta Dominant (Immune C6)
[truncated: 7,127 more rows]
